# Supplementary material for: Thiazolidinediones and Glucagon‐Like Peptide‐1 Receptor Agonists and the Risk of Nonalcoholic Fatty Liver Disease: A Cohort Study
Source: PubMed Central journal article supplement — Hepatology. 2021 Aug 22;74(5):2467–77. doi: 10.1002/hep.32012 (PMC8596626; doi:10.1002/hep.32012), 2021-08-22
Supplement: HEP-74-2467-s001.pdf [file HEP-74-2467-s001.pdf]

**Supporting TABLE S1. Baseline Laboratory Values of All Glucose-Lowering Agent Users**

| Characteristic                                | All Users<br>n = 207,367 |            | TZD Users<br>n = 2,104 |            | SU Users<br>n = 29,732 |            | GLP-1 Receptor Agonist Users<br>n = 871 |            | Insulin Users<br>n = 10,467 |            |
|-----------------------------------------------|--------------------------|------------|------------------------|------------|------------------------|------------|-----------------------------------------|------------|-----------------------------|------------|
| Most recent HbA1c record,* % (median)         | 7.9                      | (7.1-9.4)  | 7.5                    | (6.7-8.8)  | 8.5                    | (7.3-10.7) | 7.8                                     | (6.8-9.2)  | 8.8                         | (7.7-10.1) |
| Unknown (n)                                   | 71,408                   | (34.4)     | 1,312                  | (62.4)     | 15,841                 | (53.3)     | 530                                     | (60.8)     | 4,423                       | (42.3)     |
| Most recent FPG level,* mmol/L (median)       | 8.5                      | (7.1-11.9) | 7.8                    | (6.6-10.6) | 10.6                   | (7.5-16.1) | 7.9                                     | (6.0-12.1) | 9.6                         | (6.5-15.6) |
| Unknown (n)                                   | 153,932                  | (74.2)     | 1,977                  | (94.0)     | 25,439                 | (85.6)     | 827                                     | (94.9)     | 9,600                       | (91.7)     |
| Most recent ALT level,* U/L (median)          | 29                       | (20-42)    | 22                     | (16-32)    | 26                     | (18-38)    | 29                                      | (20-41)    | 24                          | (17-34)    |
| Unknown (n)                                   | 87,123                   | (42.0)     | 1,631                  | (77.5)     | 17,905                 | (60.2)     | 696                                     | (79.9)     | 6,136                       | (58.6)     |
| Most recent AST level,* U/L (median)          | 24                       | (19-32)    | 24                     | (19-29)    | 22                     | (17-30)    | 22                                      | (20-28)    | 22                          | (17-28)    |
| Unknown (n)                                   | 184,072                  | (88.8)     | 1,991                  | (94.6)     | 27,334                 | (91.9)     | 839                                     | (96.3)     | 9,642                       | (92.1)     |
| Most recent GGT level,* U/L (median)          | 45                       | (29-78)    | 35                     | (19-62)    | 46                     | (28-90)    | 39                                      | (28-71)    | 34                          | (21-63)    |
| Unknown (n)                                   | 163,674                  | (78.9)     | 1,916                  | (91.1)     | 25,134                 | (84.5)     | 811                                     | (93.1)     | 9,035                       | (86.3)     |
| Most recent ALP level,* U/L (median)          | 84                       | (69-104)   | 76                     | (59-99)    | 90                     | (72-116)   | 82                                      | (66-108)   | 88                          | (71-110)   |
| Unknown (n)                                   | 73,151                   | (35.3)     | 1,541                  | (73.2)     | 16,446                 | (55.3)     | 679                                     | (78.0)     | 5,639                       | (53.9)     |
| Most recent bilirubin level,* μmol/L (median) | 10                       | (7-13)     | 9                      | (7-12)     | 10                     | (7-13)     | 9                                       | (6-12)     | 8                           | (6-12)     |
| Unknown (n)                                   | 74,259                   | (35.8)     | 1,560                  | (74.1)     | 16,636                 | (56.0)     | 682                                     | (78.3)     | 5,700                       | (54.5)     |
| Most recent TC level,* mmol/L (median)        | 4.8                      | (4.0-5.7)  | 4.3                    | (3.7-5.0)  | 4.6                    | (3.8-5.6)  | 4.2                                     | (3.6-5.1)  | 4.4                         | (3.7-5.2)  |
| Unknown (n)                                   | 62,509                   | (30.1)     | 1,297                  | (61.6)     | 14,953                 | (50.3)     | 549                                     | (63.0)     | 4,618                       | (44.1)     |
| Most recent LDL-C level,* mmol/L (median)     | 2.7                      | (2.1-3.5)  | 2.2                    | (1.7-2.8)  | 2.6                    | (1.9-3.4)  | 2.2                                     | (1.8-3.1)  | 2.4                         | (1.8-3.1)  |
| Unknown (n)                                   | 105,264                  | (50.8)     | 1,648                  | (78.3)     | 20,664                 | (69.5)     | 703                                     | (80.7)     | 6,968                       | (66.6)     |
| Most recent HDL-C level,* mmol/L (median)     | 1.1                      | (1.0-1.4)  | 1.2                    | (1.0-1.4)  | 1.1                    | (0.9-1.4)  | 1.1                                     | (0.9-1.3)  | 1.2                         | (1.0-1.5)  |
| Unknown (n)                                   | 80,894                   | (39.0)     | 1,503                  | (71.4)     | 17,933                 | (60.3)     | 643                                     | (73.8)     | 5,922                       | (56.6)     |
| Most recent SBP record,* mm Hg (median)       | 135                      | (124-144)  | 134                    | (122-143)  | 134                    | (122-144)  | 132                                     | (124-142)  | 132                         | (120-142)  |
| Unknown (n)                                   | 31,568                   | (15.2)     | 596                    | (28.3)     | 7,524                  | (25.3)     | 272                                     | (31.2)     | 2,089                       | (20.0)     |
| Most recent DBP record,* mm Hg (median)       | 80                       | (71-85)    | 78                     | (70-83)    | 78                     | (70-84)    | 80                                      | (72-85)    | 77                          | (70-82)    |
| Unknown, (n)                                  | 31,566                   | (15.2)     | 596                    | (28.3)     | 7,523                  | (25.3)     | 272                                     | (31.2)     | 2,089                       | (20.0)     |

\*Within 1 year prior to index date.

**Supporting TABLE S2. Risk of NAFLD in Patients With Type 2 Diabetes Using TZDs Compared With SUs stratified by cumulative dose.**

| Exposure to glucose-lowering agents           | Risk of NAFLD           |         |               |                      |                  |
|-----------------------------------------------|-------------------------|---------|---------------|----------------------|------------------|
|                                               | No. of Events (n = 634) | PYs     | IR/ 1,000 PYs | Age/Sex aHR (95% CI) | aHR (95% CI)*    |
| <b>Current use of glucose-lowering agents</b> |                         |         |               |                      |                  |
| SUs                                           | 616                     | 172,309 | 3.6           | Reference            | Reference        |
| TZDs                                          | 18                      | 14,732  | 1.2           | 0.32 (0.20-0.51)     | 0.32 (0.20-0.51) |
| By cumulative dose (pioglitazone equivalents) |                         |         |               |                      |                  |
| <5.4 g                                        | 7                       | 3,713   | 1.9           | 0.47 (0.22-0.99)     | 0.44 (0.21-0.93) |
| 5.4-21.8 g                                    | <6                      | 5,759   | 0.9           | 0.23 (0.09-0.55)     | 0.23 (0.09-0.55) |
| ≥21.9 g                                       | 6                       | 5,260   | 1.1           | 0.31 (0.14-0.70)     | 0.32 (0.14-0.71) |

\*Statistically adjusted for age, sex, BMI, HbA1c, and use of systemic glucocorticoids and all other exposure categories in this table. Note: Table shows stratification of TZD users by cumulative dose, other exposure groups included in this analysis were DPP-4 inhibitors, other glucose-lowering agents, concurrent use of SUs and TZDs and past use of any glucose-lowering agents; data shown in Table 2. All groups were mutually exclusive.

**Supporting TABLE S3. Baseline Characteristics of Users of TZDs and SUs, Before and After Propensity Score Matching**

|                                      | Before Propensity Matching |      |                           |      |       | After Propensity Matching |      |                          |      |       |
|--------------------------------------|----------------------------|------|---------------------------|------|-------|---------------------------|------|--------------------------|------|-------|
|                                      | SU Users<br>(n = 68,979)   |      | TZD Users*<br>(n = 5,728) |      | SD    | SU Users<br>(n = 5,728)   |      | TZD Users<br>(n = 5,728) |      | SD    |
|                                      | n                          | %    | n                         | %    |       | n                         | %    | n                        | %    |       |
| <b>Follow-up, years (mean, SD)</b>   | 1.4                        | 1.7  | 1.4                       | 1.7  | -0.01 | 1.5                       | 1.8  | 1.4                      | 1.7  | -0.02 |
| <b>Sex</b>                           |                            |      |                           |      | -0.05 |                           |      |                          |      | 0.01  |
| Female                               | 28,956                     | 42.0 | 2,270                     | 39.6 |       | 2,250                     | 39.3 | 2,270                    | 39.6 |       |
| Male                                 | 40,023                     | 58.0 | 3,458                     | 60.4 |       | 3,478                     | 60.7 | 3,458                    | 60.4 |       |
| <b>Age, years (mean)</b>             | 62.8                       | 14.4 | 59.3                      | 12.7 | -0.26 | 58.9                      | 13.8 | 59.3                     | 12.7 | 0.03  |
| <b>Smoking status</b>                |                            |      |                           |      | 0.07  |                           |      |                          |      | 0.03  |
| Current smoker                       | 13,445                     | 19.5 | 1,108                     | 19.3 |       | 1,110                     | 19.4 | 1,108                    | 19.3 |       |
| Former smoker                        | 28,435                     | 41.2 | 2,205                     | 38.5 |       | 2,154                     | 37.6 | 2,205                    | 38.5 |       |
| Never smoker                         | 21,841                     | 31.7 | 1,886                     | 32.9 |       | 1,887                     | 32.9 | 1,886                    | 32.9 |       |
| Unknown                              | 5,258                      | 7.6  | 529                       | 9.2  |       | 577                       | 10.1 | 529                      | 9.2  |       |
| <b>Alcohol use</b>                   |                            |      |                           |      | 0.06  |                           |      |                          |      | 0.02  |
| Yes                                  | 38,758                     | 56.2 | 3,331                     | 58.2 |       | 3,218                     | 56.2 | 3,331                    | 58.2 |       |
| No                                   | 19,183                     | 27.8 | 1,452                     | 25.3 |       | 1,447                     | 25.3 | 1,452                    | 25.3 |       |
| Unknown                              | 11,038                     | 16.0 | 945                       | 16.5 |       | 1,063                     | 18.6 | 945                      | 16.5 |       |
| <b>BMI, kg/m<sup>2</sup></b>         |                            |      |                           |      | 0.28  |                           |      |                          |      | 0.05  |
| <20                                  | 1,102                      | 1.6  | 28                        | 0.5  |       | 20                        | 0.3  | 28                       | 0.5  |       |
| 20-24.9                              | 8,610                      | 12.5 | 403                       | 7.0  |       | 420                       | 7.3  | 403                      | 7.0  |       |
| 25-29.9                              | 19,020                     | 27.6 | 1,351                     | 23.6 |       | 1,312                     | 22.9 | 1,351                    | 23.6 |       |
| 30-34.9                              | 16,857                     | 24.4 | 1,515                     | 26.4 |       | 1,539                     | 26.9 | 1,515                    | 26.4 |       |
| ≥35.0                                | 14,402                     | 20.9 | 1,637                     | 28.6 |       | 1,580                     | 27.6 | 1,637                    | 28.6 |       |
| Unknown                              | 8,988                      | 13.0 | 794                       | 13.9 |       | 857                       | 15.0 | 794                      | 13.9 |       |
| <b>History of disease</b>            |                            |      |                           |      |       |                           |      |                          |      |       |
| Cardiovascular disease               | 5,767                      | 8.4  | 302                       | 5.3  | -0.12 | 273                       | 4.8  | 302                      | 5.3  | 0.02  |
| Heart failure                        | 3,194                      | 4.6  | 71                        | 1.2  | -0.20 | 74                        | 1.3  | 71                       | 1.2  | -0.00 |
| Hypertension                         | 27,803                     | 40.3 | 2,325                     | 40.6 | 0.01  | 2,239                     | 39.1 | 2,325                    | 40.6 | 0.03  |
| Chronic liver failure                | 334                        | 0.5  | 10                        | 0.2  | -0.05 | 5                         | 0.1  | 10                       | 0.2  | 0.02  |
| Chronic renal failure                | 9,128                      | 13.2 | 495                       | 8.6  | -0.15 | 472                       | 8.2  | 495                      | 8.6  | 0.01  |
| Neuropathy                           | 1,416                      | 2.1  | 132                       | 2.3  | 0.02  | 119                       | 2.1  | 132                      | 2.3  | 0.02  |
| Retinopathy                          | 5,348                      | 7.8  | 510                       | 8.9  | 0.04  | 506                       | 8.8  | 510                      | 8.9  | 0.00  |
| Microalbuminuria                     | 11,039                     | 16.0 | 945                       | 16.5 | 0.01  | 874                       | 15.3 | 945                      | 16.5 | 0.03  |
| Macroalbuminuria                     | 1,534                      | 2.2  | 97                        | 1.7  | -0.04 | 94                        | 1.6  | 97                       | 1.7  | 0.00  |
| <b>Drug use in previous 6 months</b> |                            |      |                           |      |       |                           |      |                          |      |       |
| Amiodarone                           | 215                        | 0.3  | 7                         | 0.1  | -0.04 | 5                         | 0.1  | 7                        | 0.1  | 0.01  |
| Methotrexate                         | 433                        | 0.6  | 26                        | 0.5  | -0.02 | 24                        | 0.4  | 26                       | 0.5  | 0.01  |
| Glucocorticoids                      | 6,139                      | 8.9  | 214                       | 3.7  | -0.21 | 234                       | 4.1  | 214                      | 3.7  | -0.02 |
| Valproate                            | 520                        | 0.8  | 27                        | 0.5  | -0.04 | 29                        | 0.3  | 27                       | 0.5  | 0.02  |
| <b>Most recent HbA1c**</b>           |                            |      |                           |      | 0.12  |                           |      |                          |      | 0.04  |
| <6.5%                                | 2,185                      | 3.2  | 187                       | 3.3  |       | 164                       | 2.9  | 187                      | 3.3  |       |
| 6.5%-7.5%                            | 7,391                      | 10.7 | 676                       | 11.8 |       | 626                       | 10.9 | 676                      | 11.8 |       |
| 7.6%-8.5%                            | 13,551                     | 19.6 | 1,361                     | 23.8 |       | 1,343                     | 23.4 | 1,361                    | 23.8 |       |
| >8.5%                                | 25,380                     | 36.8 | 1,878                     | 32.8 |       | 1,893                     | 33.0 | 1,878                    | 32.8 |       |
| Missing                              | 20,472                     | 29.7 | 1,626                     | 28.4 |       | 1,702                     | 29.7 | 1,626                    | 28.4 |       |
| <b>Most recent FPG level**</b>       |                            |      |                           |      | 0.12  |                           |      |                          |      | 0.03  |

|                                      |        |       |       |       |       |       |       |       |
|--------------------------------------|--------|-------|-------|-------|-------|-------|-------|-------|
| <6.0 mmol/L                          | 645    | 0.9   | 41    | 0.7   | 39    | 0.7   | 41    | 0.7   |
| 6.0-7.4 mmol/L                       | 1,753  | 2.5   | 133   | 2.3   | 112   | 2.0   | 133   | 2.3   |
| 7.5-8.9 mmol/L                       | 2,322  | 3.4   | 183   | 3.2   | 181   | 3.2   | 183   | 3.2   |
| ≥9 mmol/L                            | 8,114  | 11.8  | 481   | 8.4   | 472   | 8.2   | 481   | 8.4   |
| Missing                              | 56,145 | 81.4  | 4,890 | 85.4  | 4,924 | 86.0  | 4,890 | 85.4  |
| <b>Most recent ALT level**</b>       |        |       |       |       | 0.11  |       |       | 0.05  |
| <45 U/L                              | 33,001 | 47.8  | 2,503 | 43.7  | 2,504 | 43.7  | 2,503 | 43.7  |
| 45-70 U/L                            | 6,929  | 10.0  | 624   | 10.9  | 609   | 10.6  | 624   | 10.9  |
| 71-225 U/L                           | 4,699  | 6.8   | 373   | 6.5   | 403   | 7.0   | 373   | 6.5   |
| >225 U/L                             | 481    | 0.7   | 19    | 0.3   | 34    | 0.6   | 19    | 0.3   |
| Missing                              | 23,869 | 34.6  | 2,209 | 38.6  | 2,178 | 38.0  | 2,209 | 38.6  |
| Mean (SD)                            | 43.1   | 76.7  | 41.2  | 38.8  | 43.9  | 55.0  | 41.2  | 38.8  |
| Median (IQR)                         | 29     | 20-46 | 31    | 22-48 | 31    | 22-49 | 31    | 22-48 |
| <b>Most recent AST level**</b>       |        |       |       |       | 0.11  |       |       | 0.05  |
| <35 U/L                              | 19,987 | 29.0  | 1,420 | 24.8  | 1,511 | 26.4  | 1,420 | 24.8  |
| 35-55 U/L                            | 6,771  | 9.8   | 576   | 10.1  | 567   | 9.9   | 576   | 10.1  |
| 56-175 U/L                           | 6,030  | 8.7   | 519   | 9.1   | 522   | 9.1   | 519   | 9.1   |
| >175 U/L                             | 699    | 1.0   | 36    | 0.6   | 51    | 0.9   | 36    | 0.6   |
| Missing                              | 35,492 | 51.5  | 3,177 | 55.5  | 3,077 | 53.7  | 3,177 | 55.5  |
| Mean (SD)                            | 45.7   | 88.4  | 43.9  | 44.4  | 45.6  | 61.1  | 43.9  | 44.4  |
| Median (IQR)                         | 29     | 20-48 | 32    | 21-52 | 31    | 21-51 | 32    | 21-52 |
| <b>Most recent GGT level**</b>       |        |       |       |       | 0.12  |       |       | 0.06  |
| <55 U/L                              | 26,005 | 37.7  | 1,938 | 33.8  | 2,006 | 35.0  | 1,938 | 33.8  |
| 55-85 U/L                            | 4,517  | 6.5   | 382   | 6.7   | 385   | 6.7   | 382   | 6.7   |
| 86-275 U/L                           | 3,591  | 5.2   | 274   | 4.8   | 299   | 5.2   | 274   | 4.8   |
| >275 U/L                             | 581    | 0.8   | 19    | 0.3   | 35    | 0.6   | 19    | 0.3   |
| Missing                              | 34,285 | 49.7  | 3,115 | 54.4  | 3,003 | 52.4  | 3,115 | 54.4  |
| Mean (SD)                            | 53.5   | 111.6 | 48.7  | 64.7  | 52.5  | 100.8 | 48.7  | 64.7  |
| Median (IQR)                         | 32     | 21-55 | 34    | 23-56 | 33    | 22-56 | 34    | 23-56 |
| <b>Most recent ALP level**</b>       |        |       |       |       | 0.12  |       |       | 0.06  |
| <115 U/L                             | 41,959 | 60.8  | 3,356 | 58.6  | 3,339 | 58.3  | 3,356 | 58.6  |
| 115-575 U/L                          | 4,912  | 7.1   | 300   | 5.2   | 363   | 6.3   | 300   | 5.2   |
| >575 U/L                             | 137    | 0.2   | 1     | 0.0   | 6     | 0.1   | 1     | 0.0   |
| Missing                              | 21,971 | 31.9  | 2,071 | 36.2  | 2,020 | 35.3  | 2,071 | 36.2  |
| Mean (SD)                            | 65.5   | 86.3  | 61.2  | 47.5  | 63.8  | 61.6  | 61.2  | 47.5  |
| Median (IQR)                         | 51     | 26-84 | 53    | 28-81 | 53    | 27-84 | 53    | 28-81 |
| <b>Most recent bilirubin level**</b> |        |       |       |       | 0.12  |       |       | 0.05  |
| <20 mmol/L                           | 43,588 | 63.2  | 3,381 | 59.0  | 3,462 | 60.4  | 3,381 | 59.0  |
| 20-100 mmol/L                        | 2,911  | 4.2   | 189   | 3.3   | 217   | 3.8   | 189   | 3.3   |
| >100 mmol/L                          | 50     | 0.1   | 1     | 0.0   | 3     | 0.1   | 1     | 0.0   |
| Missing                              | 22,430 | 32.5  | 2,157 | 37.7  | 2,046 | 35.7  | 2,157 | 37.7  |
| Mean (SD)                            | 10.7   | 9.0   | 10.2  | 6.2   | 10.5  | 6.7   | 10.2  | 6.2   |
| Median (IQR)                         | 9      | 7-13  | 9     | 7-12  | 9     | 7-12  | 9     | 7-12  |
| <b>Most recent TC level**</b>        |        |       |       |       | 0.12  |       |       | 0.04  |
| ≤4.9 mmol/L                          | 32,406 | 47.0  | 2,929 | 51.1  | 2,820 | 49.2  | 2,929 | 51.1  |
| 5.0-7.9 mmol/L                       | 16,319 | 23.7  | 1,163 | 20.3  | 1,170 | 20.4  | 1,163 | 20.3  |
| ≥8 mmol/L                            | 940    | 1.4   | 32    | 0.6   | 34    | 0.6   | 32    | 0.6   |
| Missing                              | 19,314 | 28.0  | 1,604 | 28.0  | 1,704 | 29.7  | 1,604 | 28.0  |

|                                  |        |      |       |      |      |       |      |       |      |      |
|----------------------------------|--------|------|-------|------|------|-------|------|-------|------|------|
| <b>Most recent LDL-C level**</b> |        |      |       |      | 0.10 |       |      |       |      | 0.02 |
| ≤2.5 mmol/L                      | 16,580 | 24.0 | 1,484 | 25.9 |      | 1,451 | 25.3 | 1,484 | 25.9 |      |
| 2.6-3.5 mmol/L                   | 10,510 | 15.2 | 843   | 14.7 |      | 870   | 15.2 | 843   | 14.7 |      |
| ≥3.6 mmol/L                      | 6,598  | 9.6  | 402   | 7.0  |      | 396   | 6.9  | 402   | 7.0  |      |
| Missing                          | 35,291 | 51.2 | 2,999 | 52.4 |      | 3,011 | 52.6 | 2,999 | 52.4 |      |
| <b>Most recent HDL-C level**</b> |        |      |       |      | 0.04 |       |      |       |      | 0.02 |
| ≤1.0 mmol/L                      | 12,899 | 18.7 | 1,137 | 19.8 |      | 1,127 | 19.7 | 1,137 | 19.8 |      |
| 1.1-2.0 mmol/L                   | 29,005 | 42.0 | 2,421 | 42.3 |      | 2,373 | 41.4 | 2,421 | 42.3 |      |
| ≥2.1 mmol/L                      | 984    | 1.4  | 63    | 1.1  |      | 59    | 1.0  | 63    | 1.1  |      |
| Missing                          | 26,091 | 37.8 | 2,107 | 36.8 |      | 2,169 | 37.9 | 2,107 | 36.8 |      |
| <b>Most recent SBP record**</b>  |        |      |       |      | 0.04 |       |      |       |      | 0.04 |
| <100 mm Hg                       | 548    | 0.8  | 30    | 0.5  |      | 25    | 0.4  | 30    | 0.5  |      |
| 100-140 mm Hg                    | 41,024 | 59.5 | 3,431 | 59.9 |      | 3,448 | 60.2 | 3,431 | 59.9 |      |
| >140 mm Hg                       | 14,666 | 21.3 | 1,241 | 21.7 |      | 1,166 | 20.4 | 1,241 | 21.7 |      |
| Missing                          | 12,741 | 18.5 | 1,026 | 17.9 |      | 1,089 | 19.0 | 1,026 | 17.9 |      |
| <b>Most recent DBP record**</b>  |        |      |       |      | 0.03 |       |      |       |      | 0.04 |
| <60 mm Hg                        | 1,401  | 2.0  | 97    | 1.7  |      | 85    | 1.5  | 97    | 1.7  |      |
| 60-90 mm Hg                      | 50,307 | 72.9 | 4,223 | 73.7 |      | 4,198 | 73.3 | 4,223 | 73.7 |      |
| >90 mm Hg                        | 4,532  | 6.6  | 382   | 6.7  |      | 357   | 6.2  | 382   | 6.7  |      |
| Missing                          | 12,739 | 18.5 | 1,026 | 17.9 |      | 1,088 | 19.0 | 1,026 | 17.9 |      |

\*The number of TZD users is different than the number of TZD users in Table 1 of the manuscript. This is due to a difference in selection of the patients between the analyses. For the propensity score analysis we started follow-up at the first TZD or SU prescription, whereas in the main analysis we started follow-up at the first glucose-lowering drug prescription.

\*\*Within 1 year prior to index date.

Abbreviations: IQR, interquartile range; SD, standardized difference.

**Supporting TABLE S4. Risk of NAFLD in Patients With Type 2 Diabetes Using TZDs Compared With SUs in a Propensity Score–Matched Analysis**

| Exposure to glucose-lowering agents* | Risk of NAFLD |                           |                  |                  |
|--------------------------------------|---------------|---------------------------|------------------|------------------|
|                                      | Patients      | No. of Events<br>(n = 57) | IR/<br>1,000 PYs | aHR (95% CI)     |
| SUs                                  | 5,728         | 45                        | 5.4              | Reference        |
| TZDs                                 | 5,728         | 12                        | 1.5              | 0.27 (0.14-0.52) |

\*Current use of the glucose-lowering agent at start of follow-up.

**Supporting TABLE S5. Incidence Rate of HCC in Patients With Type 2 Diabetes Using TZDs and SUs**

|                                               | Latency Period of 6 Months |         |                     | Latency Period of 24 Months |         |                     |
|-----------------------------------------------|----------------------------|---------|---------------------|-----------------------------|---------|---------------------|
|                                               | No. of Events<br>(n = 213) | PYs     | IR/<br>1,000<br>PYs | No. of Events<br>(n = 142)  | PYs     | IR/<br>1,000<br>PYs |
| <b>Exposure to glucose-lowering agents</b>    |                            |         |                     |                             |         |                     |
| <b>Current use of glucose-lowering agents</b> |                            |         |                     |                             |         |                     |
| SUs                                           | 55                         | 176,845 | 0.3                 | 42                          | 176,828 | 0.2                 |
| TZDs                                          | <6                         | 15,016  | 0.3                 | <6                          | 15,014  | 0.3                 |
| DPP-4 inhibitors                              | 13                         | 46,960  | 0.3                 | 12                          | 46,958  | 0.3                 |
| Other glucose-lowering agents                 | 96                         | 470,394 | 0.2                 | 57                          | 470,338 | 0.1                 |
| <b>Current combined use</b>                   |                            |         |                     |                             |         |                     |
| TZDs and SUs                                  | <6                         | 9,826   | 0.2                 | <6                          | 9,826   | 0.2                 |
| <b>Past use</b>                               |                            |         |                     |                             |         |                     |
| Past use of glucose-lowering agents           | 42                         | 371,335 | 0.1                 | 25                          | 371,326 | 0.1                 |

Note: All groups in this table were mutually exclusive. Current use (1-90 days) or past use (>90 days) were defined by the time since the most recent prescription.

**Supporting TABLE S6. Baseline Characteristics of Users of Insulins and GLP-1 Receptor Agonists, Before and After Propensity Score Matching**

|                                      | Before Propensity Matching    |      |                                              |      |       | After Propensity Matching    |      |                                             |      |       |
|--------------------------------------|-------------------------------|------|----------------------------------------------|------|-------|------------------------------|------|---------------------------------------------|------|-------|
|                                      | Insulin Users<br>(n = 24,302) |      | GLP-1 Receptor Agonist Users*<br>(n = 7,063) |      | SD    | Insulin Users<br>(n = 4,944) |      | GLP-1 Receptor Agonist Users<br>(n = 4,944) |      | SD    |
|                                      | n                             | %    | n                                            | %    |       | n                            | %    | n                                           | %    |       |
| <b>Follow-up, years (mean, SD)</b>   | 1.2                           | 2.0  | 1.0                                          | 1.1  | 0.85  | 1.3                          | 1.8  | 1.0                                         | 1.1  | 0.03  |
| <b>Sex</b>                           |                               |      |                                              |      | -0.04 |                              |      |                                             |      | -0.01 |
| Female                               | 12,013                        | 49.4 | 3,341                                        | 47.3 |       | 2,423                        | 49.0 | 2,403                                       | 48.6 |       |
| Male                                 | 12,289                        | 50.6 | 3,722                                        | 52.7 |       | 2,521                        | 51.0 | 2,541                                       | 51.4 |       |
| <b>Age, years (mean)</b>             | 55.6                          | 17.8 | 55.0                                         | 11.0 | -0.04 | 55.9                         | 14.9 | 55.4                                        | 11.2 | -0.04 |
| <b>Smoking status</b>                |                               |      |                                              |      | 0.46  |                              |      |                                             |      | 0.06  |
| Current smoker                       | 8,120                         | 33.4 | 2,112                                        | 29.9 |       | 1,479                        | 29.9 | 1,545                                       | 31.3 |       |
| Former smoker                        | 5,142                         | 21.2 | 1,455                                        | 20.6 |       | 1,075                        | 21.7 | 1,038                                       | 21.0 |       |
| Never smoker                         | 7,684                         | 31.6 | 3,280                                        | 46.4 |       | 2,124                        | 43.0 | 2,148                                       | 43.4 |       |
| Unknown                              | 3,356                         | 13.8 | 216                                          | 3.1  |       | 266                          | 5.4  | 213                                         | 4.3  |       |
| <b>Alcohol use</b>                   |                               |      |                                              |      | 0.45  |                              |      |                                             |      | 0.02  |
| Yes                                  | 7,067                         | 29.1 | 2,094                                        | 29.6 |       | 1,568                        | 31.7 | 1,557                                       | 31.5 |       |
| No                                   | 11,250                        | 46.3 | 4,350                                        | 61.6 |       | 2,793                        | 56.5 | 2,825                                       | 57.1 |       |
| Unknown                              | 5,985                         | 24.6 | 619                                          | 8.8  |       | 583                          | 11.8 | 562                                         | 11.4 |       |
| <b>BMI, kg/m<sup>2</sup></b>         |                               |      |                                              |      | 1.32  |                              |      |                                             |      | 0.07  |
| <20                                  | 724                           | 3.0  | 3                                            | 0.0  |       | 6                            | 0.1  | 3                                           | 0.1  |       |
| 20-24.9                              | 3,551                         | 14.6 | 54                                           | 0.8  |       | 78                           | 1.6  | 54                                          | 1.1  |       |
| 25-29.9                              | 6,088                         | 25.1 | 521                                          | 7.4  |       | 514                          | 10.4 | 521                                         | 10.5 |       |
| 30-34.9                              | 4,820                         | 19.8 | 1,702                                        | 24.1 |       | 1,499                        | 30.3 | 1,604                                       | 32.4 |       |
| ≥35.0                                | 4,151                         | 17.1 | 4,424                                        | 62.6 |       | 2,446                        | 49.5 | 2,403                                       | 48.6 |       |
| Unknown                              | 4,968                         | 20.4 | 359                                          | 5.1  |       | 401                          | 8.1  | 359                                         | 7.3  |       |
| <b>History of disease</b>            |                               |      |                                              |      |       |                              |      |                                             |      |       |
| Cardiovascular disease               | 1,947                         | 8.0  | 302                                          | 4.0  | -0.17 | 230                          | 4.7  | 249                                         | 5.0  | 0.02  |
| Heart failure                        | 1,085                         | 4.5  | 71                                           | 2.7  | -0.09 | 164                          | 3.3  | 169                                         | 3.4  | 0.01  |
| Hypertension                         | 7,742                         | 31.9 | 2,325                                        | 44.5 | 0.26  | 2,065                        | 41.8 | 2,054                                       | 41.5 | -0.00 |
| Chronic liver failure                | 163                           | 0.7  | 10                                           | 0.2  | -0.07 | 15                           | 0.3  | 15                                          | 0.3  | 0.00  |
| Chronic renal failure                | 2,981                         | 12.3 | 495                                          | 6.9  | -0.18 | 441                          | 8.9  | 431                                         | 8.7  | -0.01 |
| Neuropathy                           | 881                           | 3.6  | 132                                          | 3.3  | -0.02 | 168                          | 3.4  | 165                                         | 3.3  | -0.00 |
| Retinopathy                          | 2,902                         | 11.9 | 510                                          | 11.0 | -0.03 | 561                          | 11.3 | 563                                         | 11.4 | 0.00  |
| Microalbuminuria                     | 3,491                         | 14.4 | 945                                          | 27.6 | 0.33  | 1,190                        | 24.1 | 1,130                                       | 22.9 | -0.03 |
| Macroalbuminuria                     | 667                           | 2.7  | 97                                           | 3.4  | 0.04  | 155                          | 3.1  | 159                                         | 3.2  | 0.00  |
| <b>Drug use in previous 6 months</b> |                               |      |                                              |      |       |                              |      |                                             |      |       |
| Amiodarone                           | 71                            | 0.3  | 13                                           | 0.2  | -0.02 | 12                           | 0.2  | 11                                          | 0.2  | -0.00 |
| Methotrexate                         | 116                           | 0.5  | 50                                           | 0.7  | 0.03  | 34                           | 0.7  | 32                                          | 0.6  | -0.01 |
| Glucocorticoids                      | 1,781                         | 7.3  | 483                                          | 6.8  | -0.02 | 361                          | 7.3  | 385                                         | 7.8  | 0.02  |
| Valproate                            | 189                           | 0.8  | 57                                           | 0.8  | 0.00  | 36                           | 0.7  | 42                                          | 0.8  | 0.01  |
| <b>Most recent HbA1c**</b>           |                               |      |                                              |      | 0.85  |                              |      |                                             |      | 0.03  |
| <6.5%                                | 917                           | 3.8  | 174                                          | 2.5  |       | 144                          | 2.9  | 161                                         | 3.3  |       |
| 6.5%-7.5%                            | 1,392                         | 5.7  | 554                                          | 7.8  |       | 377                          | 7.6  | 399                                         | 8.1  |       |
| 7.6%-8.5%                            | 1,983                         | 8.2  | 1,428                                        | 20.2 |       | 786                          | 15.9 | 754                                         | 15.3 |       |
| >8.5%                                | 8,548                         | 35.2 | 4,016                                        | 56.9 |       | 2,741                        | 55.4 | 2,745                                       | 55.5 |       |



|                                      |        |       |       |       |      |       |       |       |       |      |
|--------------------------------------|--------|-------|-------|-------|------|-------|-------|-------|-------|------|
| Missing                              | 11,462 | 47.2  | 891   | 12.6  |      | 896   | 18.1  | 885   | 17.9  |      |
| <b>Most recent FPG level**</b>       |        |       |       |       | 0.17 |       |       |       |       | 0.02 |
| <6.0 mmol/L                          | 352    | 1.4   | 37    | 0.5   |      | 39    | 0.8   | 37    | 0.7   |      |
| 6.0-7.4 mmol/L                       | 354    | 1.5   | 122   | 1.7   |      | 84    | 1.7   | 91    | 1.8   |      |
| 7.5-8.9 mmol/L                       | 287    | 1.2   | 180   | 2.5   |      | 100   | 2.0   | 106   | 2.1   |      |
| ≥9 mmol/L                            | 1,661  | 6.8   | 683   | 9.7   |      | 431   | 8.7   | 444   | 9.0   |      |
| Missing                              | 21,648 | 89.1  | 6,041 | 85.5  |      | 4,290 | 86.8  | 4,266 | 86.3  |      |
| <b>Most recent ALT level**</b>       |        |       |       |       | 0.66 |       |       |       |       | 0.12 |
| <45 U/L                              | 9,078  | 37.4  | 3,732 | 52.8  |      | 2,529 | 51.2  | 2,472 | 50.0  |      |
| 45-70 U/L                            | 1,322  | 5.4   | 1,094 | 15.5  |      | 508   | 10.3  | 679   | 13.7  |      |
| 71-225 U/L                           | 1,097  | 4.5   | 574   | 8.1   |      | 361   | 7.3   | 371   | 7.5   |      |
| >225 U/L                             | 181    | 0.7   | 39    | 0.6   |      | 46    | 0.9   | 24    | 0.5   |      |
| Missing                              | 12,624 | 51.9  | 1,624 | 23.0  |      | 1,500 | 30.3  | 1,398 | 28.3  |      |
| Mean (SD)                            | 44.0   | 131.4 | 45.0  | 101.0 |      | 47.2  | 181.6 | 44.3  | 101.3 |      |
| Median (IQR)                         | 26     | 18-41 | 33    | 23-50 |      | 29    | 20-46 | 33    | 23-49 |      |
| <b>Most recent AST level**</b>       |        |       |       |       | 0.55 |       |       |       |       | 0.16 |
| <35 U/L                              | 5,897  | 24.3  | 2,262 | 32.0  |      | 1,587 | 32.1  | 1,516 | 30.7  |      |
| 35-55 U/L                            | 1,330  | 5.5   | 1,107 | 15.7  |      | 484   | 9.8   | 707   | 14.3  |      |
| 56-175 U/L                           | 1,328  | 5.5   | 832   | 11.8  |      | 452   | 9.1   | 526   | 10.6  |      |
| >175 U/L                             | 246    | 1.0   | 50    | 0.7   |      | 57    | 1.2   | 29    | 0.6   |      |
| Missing                              | 15,501 | 63.8  | 2,812 | 39.8  |      | 2,364 | 47.8  | 2,166 | 43.8  |      |
| Mean (SD)                            | 47.1   | 146.9 | 46.2  | 113.4 |      | 50.6  | 209.2 | 45.3  | 113.6 |      |
| Median (IQR)                         | 25     | 17-43 | 33    | 23-51 |      | 28    | 19-48 | 32    | 22-50 |      |
| <b>Most recent GGT level**</b>       |        |       |       |       | 0.51 |       |       |       |       | 0.12 |
| <55 U/L                              | 7,130  | 29.3  | 3,246 | 46.0  |      | 2,053 | 41.5  | 2,145 | 43.4  |      |
| 55-85 U/L                            | 931    | 3.8   | 691   | 9.8   |      | 333   | 6.7   | 438   | 8.9   |      |
| 86-275 U/L                           | 914    | 3.8   | 363   | 5.1   |      | 272   | 5.5   | 234   | 4.7   |      |
| >275 U/L                             | 229    | 0.9   | 35    | 0.5   |      | 62    | 1.3   | 28    | 0.6   |      |
| Missing                              | 15,098 | 62.1  | 2,728 | 38.6  |      | 2,224 | 45.0  | 2,099 | 42.5  |      |
| Mean (SD)                            | 66.8   | 470.5 | 50.3  | 115.2 |      | 65.8  | 367.9 | 50.2  | 116.4 |      |
| Median (IQR)                         | 27     | 18-50 | 35    | 24-55 |      | 31    | 20-54 | 34    | 23-54 |      |
| <b>Most recent ALP level**</b>       |        |       |       |       | 0.66 |       |       |       |       | 0.12 |
| <115 U/L                             | 10,557 | 43.4  | 5,144 | 72.8  |      | 3,130 | 63.3  | 3,367 | 68.1  |      |
| 115-575 U/L                          | 1,536  | 6.3   | 444   | 6.3   |      | 398   | 8.1   | 290   | 5.9   |      |
| >575 U/L                             | 59     | 0.2   | 11    | 0.2   |      | 16    | 0.3   | 6     | 0.1   |      |
| Missing                              | 12,150 | 50.0  | 1,464 | 20.7  |      | 1,400 | 28.3  | 1,281 | 25.9  |      |
| Mean (SD)                            | 75.4   | 402.0 | 60.9  | 102.9 |      | 73.8  | 316.6 | 60.6  | 103.4 |      |
| Median (IQR)                         | 45     | 22-87 | 48    | 27-78 |      | 48    | 24-86 | 47    | 27-78 |      |
| <b>Most recent bilirubin level**</b> |        |       |       |       | 0.67 |       |       |       |       | 0.05 |
| <20 mmol/L                           | 11,192 | 46.1  | 5,382 | 76.2  |      | 3,334 | 67.4  | 3,514 | 71.1  |      |
| 20-100 mmol/L                        | 711    | 2.9   | 194   | 2.7   |      | 168   | 3.4   | 128   | 2.6   |      |
| >100 mmol/L                          | 54     | 0.2   | 1     | 0.0   |      | 7     | 0.1   | 1     | 0.0   |      |
| Missing                              | 12,345 | 50.8  | 1,486 | 21.0  |      | 1,435 | 29.0  | 1,301 | 26.3  |      |
| Mean (SD)                            | 10.9   | 14.3  | 9.4   | 4.8   |      | 10.2  | 10.8  | 9.4   | 5.0   |      |
| Median (IQR)                         | 9      | 6-12  | 8     | 6-11  |      | 8     | 6-12  | 8     | 6-11  |      |
| <b>Most recent TC level**</b>        |        |       |       |       | 0.80 |       |       |       |       | 0.02 |
| ≤4.9 mmol/L                          | 8,216  | 33.8  | 4,427 | 62.7  |      | 2,724 | 55.1  | 2,736 | 55.3  |      |
| 5.0-7.9 mmol/L                       | 4,075  | 16.8  | 1,566 | 22.2  |      | 1,178 | 23.8  | 1,168 | 23.6  |      |

|                                  |        |      |       |      |      |       |      |       |      |      |
|----------------------------------|--------|------|-------|------|------|-------|------|-------|------|------|
| ≥8 mmol/L                        | 302    | 1.2  | 48    | 0.7  |      | 38    | 0.8  | 45    | 0.9  |      |
| Missing                          | 11,709 | 48.2 | 1,022 | 14.5 |      | 1,004 | 20.3 | 995   | 20.1 |      |
| <b>Most recent LDL-C level**</b> |        |      |       |      | 0.62 |       |      |       |      | 0.03 |
| ≤2.5 mmol/L                      | 3,886  | 16.0 | 2,247 | 31.8 |      | 1,377 | 27.9 | 1,320 | 26.7 |      |
| 2.6-3.5 mmol/L                   | 2,473  | 10.2 | 1,387 | 19.6 |      | 857   | 17.3 | 872   | 17.6 |      |
| ≥3.6 mmol/L                      | 1,543  | 6.3  | 752   | 10.6 |      | 516   | 10.4 | 500   | 10.1 |      |
| Missing                          | 16,400 | 67.5 | 2,677 | 37.9 |      | 2,194 | 44.4 | 2,252 | 45.6 |      |
| <b>Most recent HDL-C level**</b> |        |      |       |      | 0.78 |       |      |       |      | 0.02 |
| ≤1.0 mmol/L                      | 3,304  | 13.6 | 2,110 | 29.9 |      | 1,341 | 27.1 | 1,326 | 26.8 |      |
| 1.1-2.0 mmol/L                   | 6,677  | 27.5 | 3,299 | 46.7 |      | 2,056 | 41.6 | 2,087 | 42.2 |      |
| ≥2.1 mmol/L                      | 384    | 1.6  | 30    | 0.4  |      | 34    | 0.7  | 30    | 0.6  |      |
| Missing                          | 13,937 | 57.3 | 1,624 | 23.0 |      | 1,513 | 30.6 | 1,501 | 30.4 |      |
| <b>Most recent SBP record**</b>  |        |      |       |      | 0.47 |       |      |       |      | 0.05 |
| <100 mm Hg                       | 385    | 1.6  | 37    | 0.5  |      | 34    | 0.7  | 32    | 0.6  |      |
| 100-140 mm Hg                    | 13,725 | 56.5 | 4,909 | 69.5 |      | 3,253 | 65.8 | 3,330 | 67.4 |      |
| >140 mm Hg                       | 3,901  | 16.1 | 1,473 | 20.9 |      | 1,023 | 20.7 | 1,019 | 20.6 |      |
| Missing                          | 6,291  | 25.9 | 644   | 9.1  |      | 634   | 12.8 | 563   | 11.4 |      |
| <b>Most recent DBP record**</b>  |        |      |       |      | 0.50 |       |      |       |      | 0.05 |
| <60 mm Hg                        | 677    | 2.8  | 56    | 0.8  |      | 59    | 1.2  | 52    | 1.1  |      |
| 60-90 mm Hg                      | 16,098 | 66.2 | 5,731 | 81.1 |      | 3,842 | 77.7 | 3,936 | 79.6 |      |
| >90 mm Hg                        | 1,234  | 5.1  | 632   | 8.9  |      | 409   | 8.3  | 393   | 7.9  |      |
| Missing                          | 6,293  | 25.9 | 644   | 9.1  |      | 634   | 12.8 | 563   | 11.4 |      |

\*The number of GLP-1 receptor agonist users is different than the number of GLP-1 receptor agonist users in Table 1 of the manuscript. This is due to a difference in selection of the patients between the analyses. For the propensity score analysis we started follow-up at the first GLP-1 receptor agonist or insulin prescription, whereas in the main analysis we started follow-up at the first glucose-lowering drug prescription.

\*\*Within 1 year prior to index date.

**Supporting TABLE S7. Risk of NAFLD in Patients With Type 2 Diabetes Using Insulins Compared With GLP-1 Receptor Agonists in a Propensity Score–Matched analysis**

|                                      | Risk of NAFLD |                           |                  |                  |
|--------------------------------------|---------------|---------------------------|------------------|------------------|
|                                      | Patients      | No. of Events<br>(n = 65) | IR/<br>1,000 PYs | aHR (95% CI)     |
| Exposure to glucose-lowering agents* |               |                           |                  |                  |
| Insulins                             | 4,944         | 31                        | 6.4              | Reference        |
| GLP-1 receptor agonists              | 4,944         | 34                        | 5.4              | 1.08 (0.66-1.77) |

\*Current use of the glucose-lowering agent at start of follow-up.

**Supporting TABLE S8. Risk of NAFLD in Patients With Type 2 Diabetes Using GLP-1 Receptor Agonists Compared With SUs**

| Exposure to glucose-lowering agents           | Risk of NAFLD                |         |                     |                         |                  |
|-----------------------------------------------|------------------------------|---------|---------------------|-------------------------|------------------|
|                                               | No. of Events<br>(n = 2,526) | PYs     | IR/<br>1,000<br>PYs | Age/Sex aHR<br>(95% CI) | aHR<br>(95% CI)* |
| <b>Current use of glucose-lowering agents</b> |                              |         |                     |                         |                  |
| SUs                                           | 605                          | 175,010 | 3.5                 | Reference               | Reference        |
| GLP-1 receptor agonists                       | 52                           | 10,578  | 4.9                 | 1.06 (0.80-1.41)        | 0.85 (0.64-1.13) |
| Other glucose-lowering agents                 | 1,678                        | 509,445 | 3.3                 | 0.87 (0.80-0.96)        | 0.90 (0.82-0.99) |
| <b>Current combined use</b>                   |                              |         |                     |                         |                  |
| GLP-1 receptor agonists and SUs               | 31                           | 6,923   | 4.5                 | 1.03 (0.72-1.47)        | 0.77 (0.53-1.10) |
| <b>Past use</b>                               |                              |         |                     |                         |                  |
| Past use of glucose-lowering agents           | 160                          | 363,620 | 0.4                 | 0.11 (0.09-0.13)        | 0.22 (0.18-0.27) |

\*Statistically adjusted for age, sex, smoking, alcohol use, BMI, HbA1c, FPG, TC, HDL-C, LDL-C, SBP, DBP, hypertension, retinopathy, microalbuminuria, and use of systemic glucocorticoids.

Note: All groups in this table were mutually exclusive. Current use (1-90 days) or past use (>90 days) were defined by the time since the most recent prescription.

**Supporting TABLE S9. Incidence Rate of HCC in Patients With Type 2 Diabetes Using GLP-1 Receptor Agonists and Insulins**

|                                               | Latency Period of 6 Months |         |                     | Latency Period of 24 Months |         |                     |
|-----------------------------------------------|----------------------------|---------|---------------------|-----------------------------|---------|---------------------|
|                                               | No. of Events<br>(n = 213) | PYs     | IR/<br>1,000<br>PYs | No. of Events<br>(n = 142)  | PYs     | IR/<br>1,000<br>PYs |
| <b>Exposure to glucose-lowering agents</b>    |                            |         |                     |                             |         |                     |
| <b>Current use of glucose-lowering agents</b> |                            |         |                     |                             |         |                     |
| Insulins                                      | 22                         | 60,688  | 0.4                 | 14                          | 60,678  | 0.2                 |
| GLP-1 receptor agonists                       | <6                         | 14,412  | 0.1                 | <6                          | 14,412  | 0.1                 |
| Other glucose-lowering agents                 | 146                        | 639,968 | 0.2                 | 101                         | 639,902 | 0.2                 |
| <b>Current combined use</b>                   |                            |         |                     |                             |         |                     |
| GLP-1 receptor agonists and insulins          | <6                         | 3,972   | 0.5                 | <6                          | 3,971   | 0.3                 |
| <b>Past use</b>                               |                            |         |                     |                             |         |                     |
| Past use of glucose-lowering agents           | 42                         | 371,335 | 0.1                 | 25                          | 371,326 | 0.1                 |

Note: All groups in this table were mutually exclusive. Current use (1-90 days) or past use (>90 days) were defined by the time since the most recent prescription.

## **Supporting Information**

### **Propensity score–matched sensitivity analyses**

#### **Study population**

##### **Comparing use of sulfonylureas with use of thiazolidinediones**

In the first sensitivity analysis, we used propensity score matching to control for confounding in the analysis comparing use of thiazolidinediones (TZDs) with use of sulfonylureas (SUs). For the propensity score analyses we included all patients who were new users of SUs or TZDs during the study period. The date of the first prescription (of an SU or TZD) determined the index date. Patients who were prescribed both an SU and a TZD at the index date were excluded. Patients with a history of polycystic ovarian syndrome (PCOS), nonalcoholic fatty liver disease (NAFLD), or hepatocellular carcinoma (HCC) were excluded as well.

##### **Comparing use of glucagon-like peptide-1 receptor agonists with use of insulin**

We also performed a propensity score–matched sensitivity analysis comparing use of glucagon-like peptide-1 (GLP-1) receptor agonists with use of insulin. In this analysis we included all patients who were new users of GLP-1 receptor agonists or insulin during the study period. The date of the first prescription (of a GLP-1 receptor agonist or insulin) determined the index date. Patients who were prescribed both a GLP-1 receptor agonist and an insulin at the index date were excluded. Patients with a history of PCOS, NAFLD, or HCC were excluded as well.

#### **Follow-up**

##### **Comparing use of SUs with use of TZDs**

Patients were followed from their index date until the date of the event of interest, end of data collection, death, switch to the comparator drug, or treatment discontinuation, whichever came first. The expected end date was calculated for each prescription based on the prescribed quantity and written dosage instructions. Treatment discontinuation was defined as no refill after the last prescription or within 30 days after the expected end date of the last prescription.

### **Comparing use of GLP-1 receptor agonists with use of insulin**

Patients were followed from their index date until the date of the event of interest, end of data collection, death, switch to the comparator drug, or treatment discontinuation, whichever came first. The total amount of defined daily dosages (DDD) was calculated for each prescription based on the prescribed number of pens and the amount of DDDs per pen.<sup>(1)</sup> The expected end date of a prescription was calculated as the date of the prescription plus the number of prescribed DDDs, assuming that patients used 1 DDD per day. Treatment discontinuation was defined as no refill after the last prescription or within 30 days after the expected end date of the last prescription.

### **Baseline covariates**

#### **For both propensity score analyses**

Based on the literature, we selected covariates related to NAFLD and the exposure of interest. We determined the presence of the following covariates at index date: age, sex, smoking status, body mass index (BMI), and alcohol use. A history of the following covariates was also determined at index date: cardiovascular disease, chronic kidney disease, heart failure, chronic liver disease, hypertension, neuropathy, retinopathy, microalbuminuria, and macroalbuminuria, as well as use of the following drugs in the 6 months before the index date: amiodarone, methotrexate, systemic glucocorticoids, and valproate. Furthermore, we

determined the following most recently recorded laboratory values in the year prior to the index date: hemoglobin A1c (HbA1c), total cholesterol (TC), low-density lipoprotein cholesterol (LDL-C), high-density lipoprotein cholesterol (HDL-C), fasting plasma glucose (FPG), systolic blood pressure (SBD), and diastolic blood pressure (DBD). If two or more laboratory measurements were recorded on the same date, the average value was used in the analysis. An indicator variable was used to account for missing data.

## **Statistical analysis**

### **For both propensity score analyses**

Multivariable logistic regression, including all baseline covariates mentioned in the previous section, was used to estimate the probability of receiving a TZD versus an SU or a GLP-1 receptor agonist versus an insulin, respectively. A histogram of the estimated probabilities per exposure was created to check for the overlap in the estimated probabilities (Supporting Fig. S5). This was done both before and after matching. Patients initiating TZDs or GLP-1 receptor agonists were matched (without replacement) to one patient initiating SUs or insulins, respectively, on their estimated propensity score using nearest neighbor matching with a matching caliper of 0.02 on the propensity score scale.<sup>(2, 3)</sup> Standardized differences were calculated to check the balance after matching. After matching, Cox proportional hazards models were used to estimate hazard ratios (HRs) and 95% confidence intervals (CIs) for NAFLD associated with use of TZDs compared with use of SUs and use of GLP-1 receptor agonists compared with use of insulins. A Kaplan-Meier curve was used to visualize the time to NAFLD for both exposure groups.



## REFERENCES

- 1) WHO Collaborating Centre for Drug Statistics Methodology. ATC/DDD index 2021. [https://www.whocc.no/atc\\_ddd\\_index/](https://www.whocc.no/atc_ddd_index/). Last updated December 17, 2020. Accessed September 16, 2020.
- 2) Austin PC. Some methods of propensity-score matching had superior performance to others: results of an empirical investigation and Monte Carlo simulations. *Biom J* 2009;51:171-184.
- 3) Rassen JA , Doherty M, Huang W, Schneeweiss S. *Pharmacoepidemiology Toolbox*. Boston MA. <http://www.hdpharmacoepi.org>. Accessed 6 May 2020

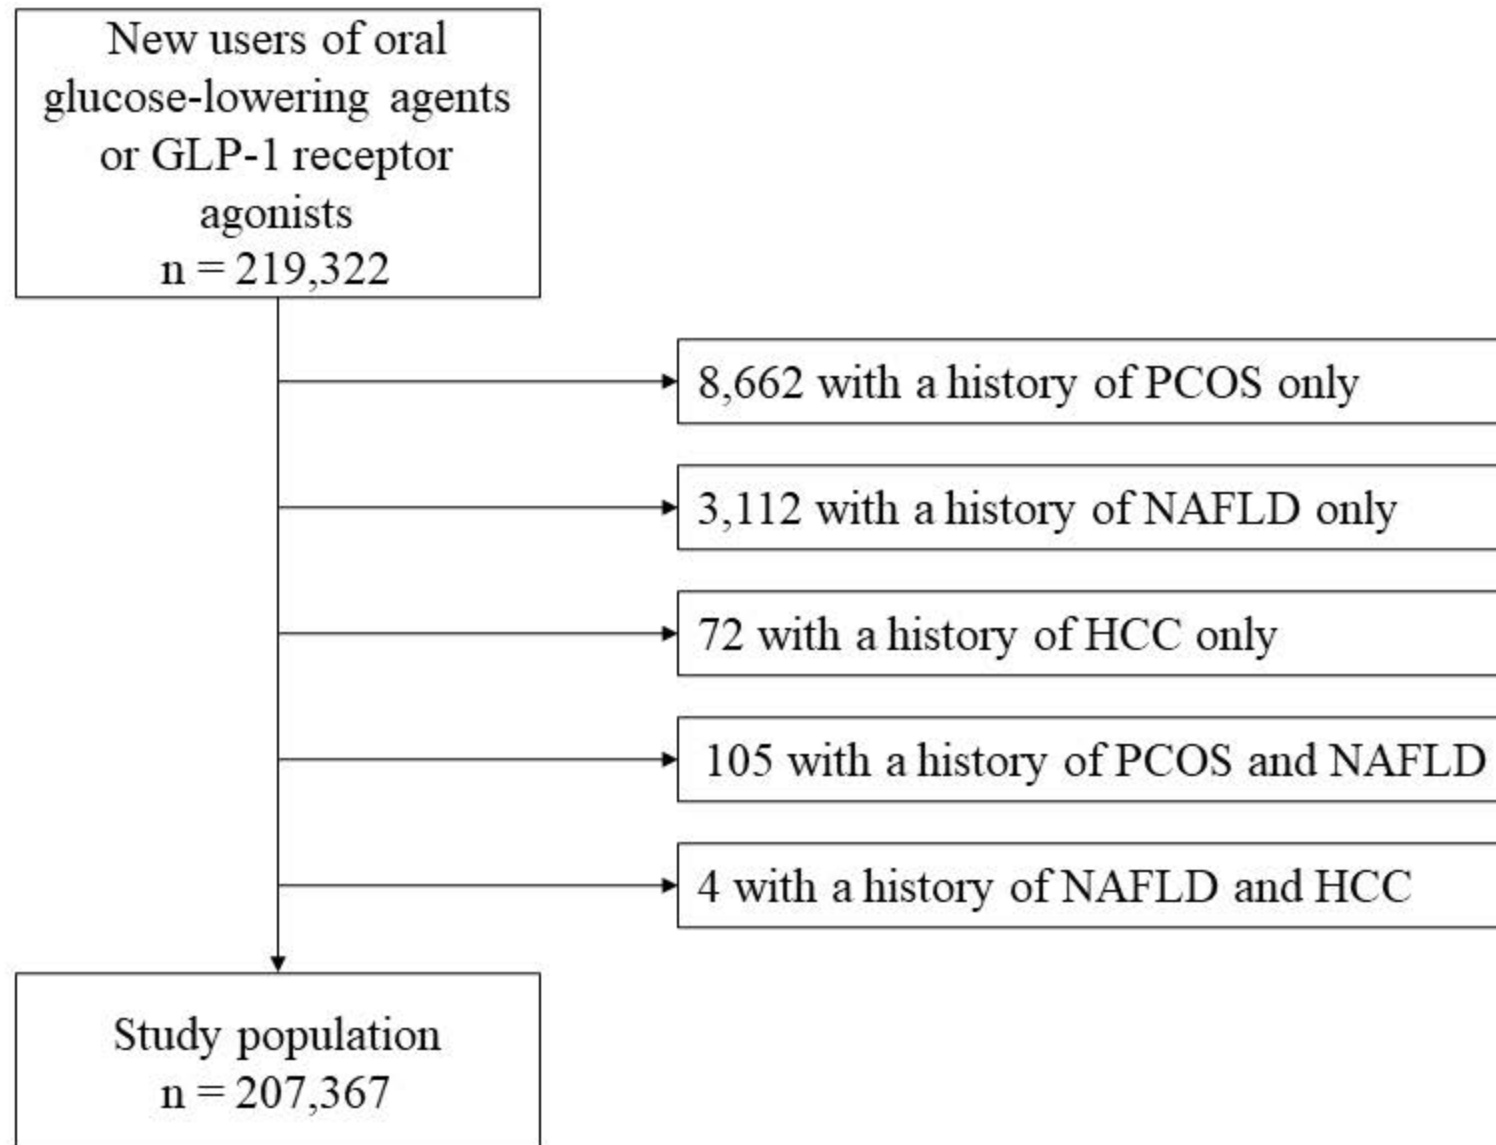

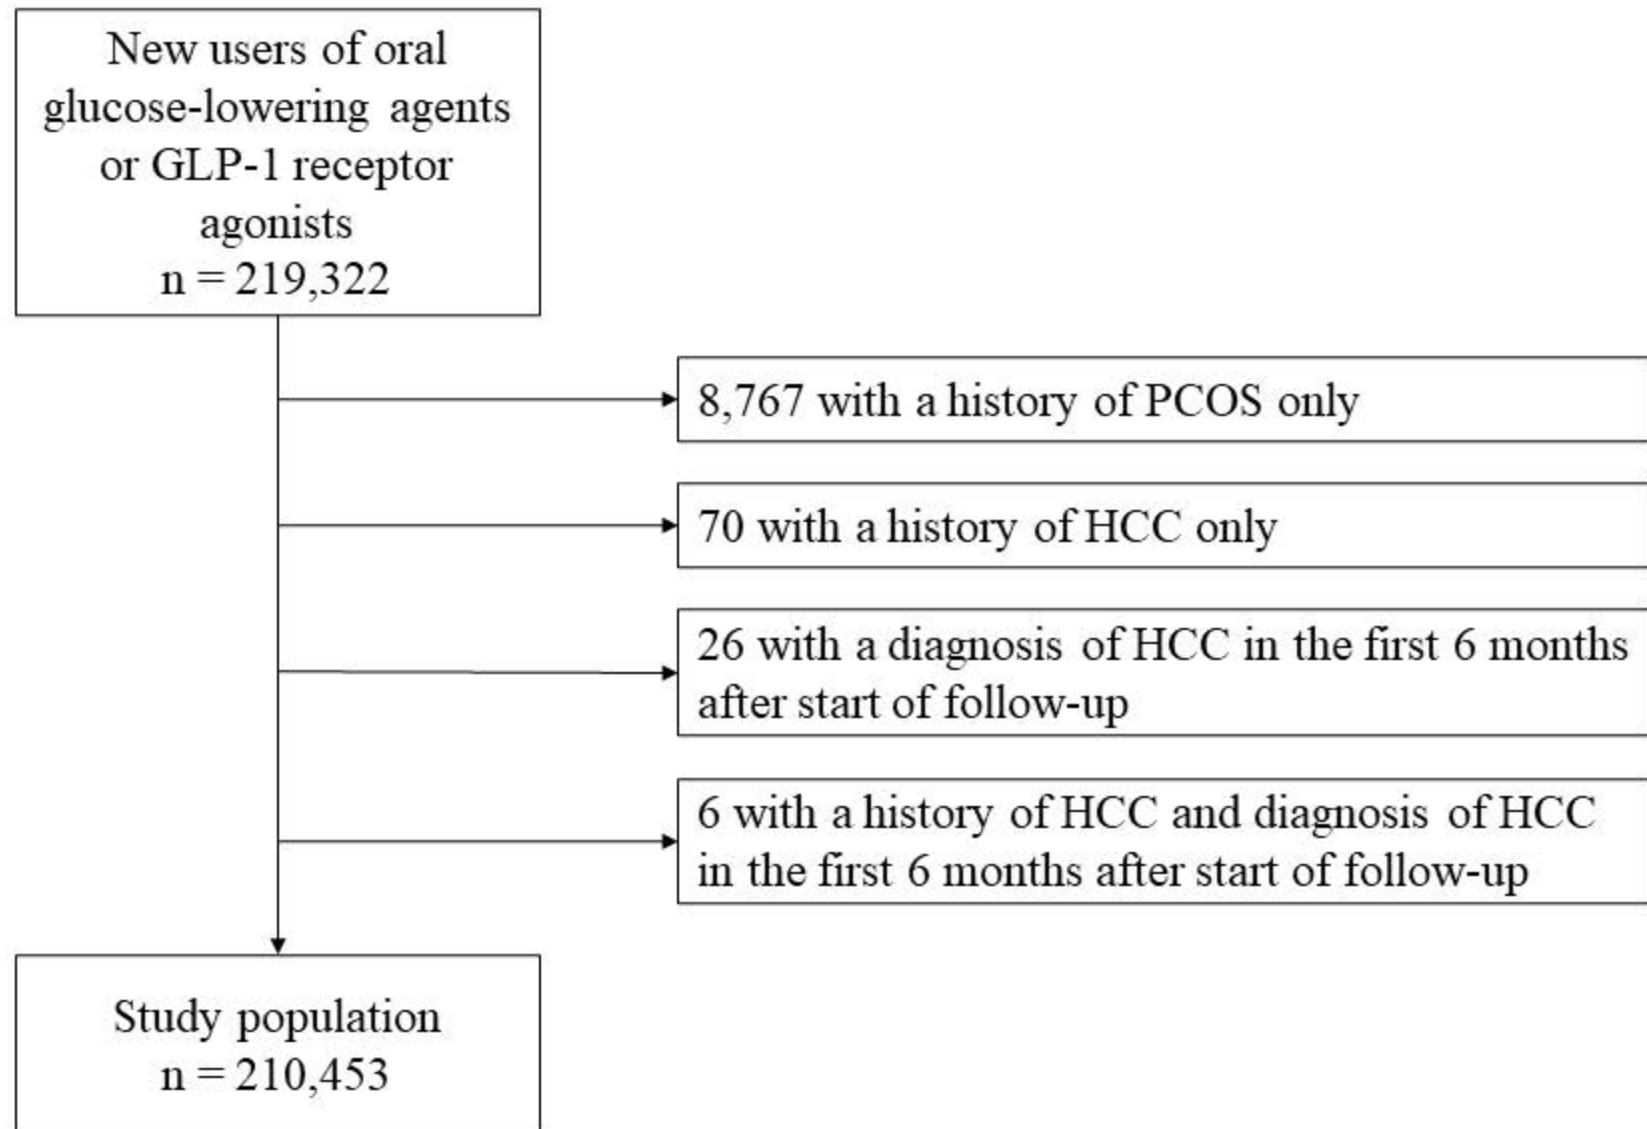

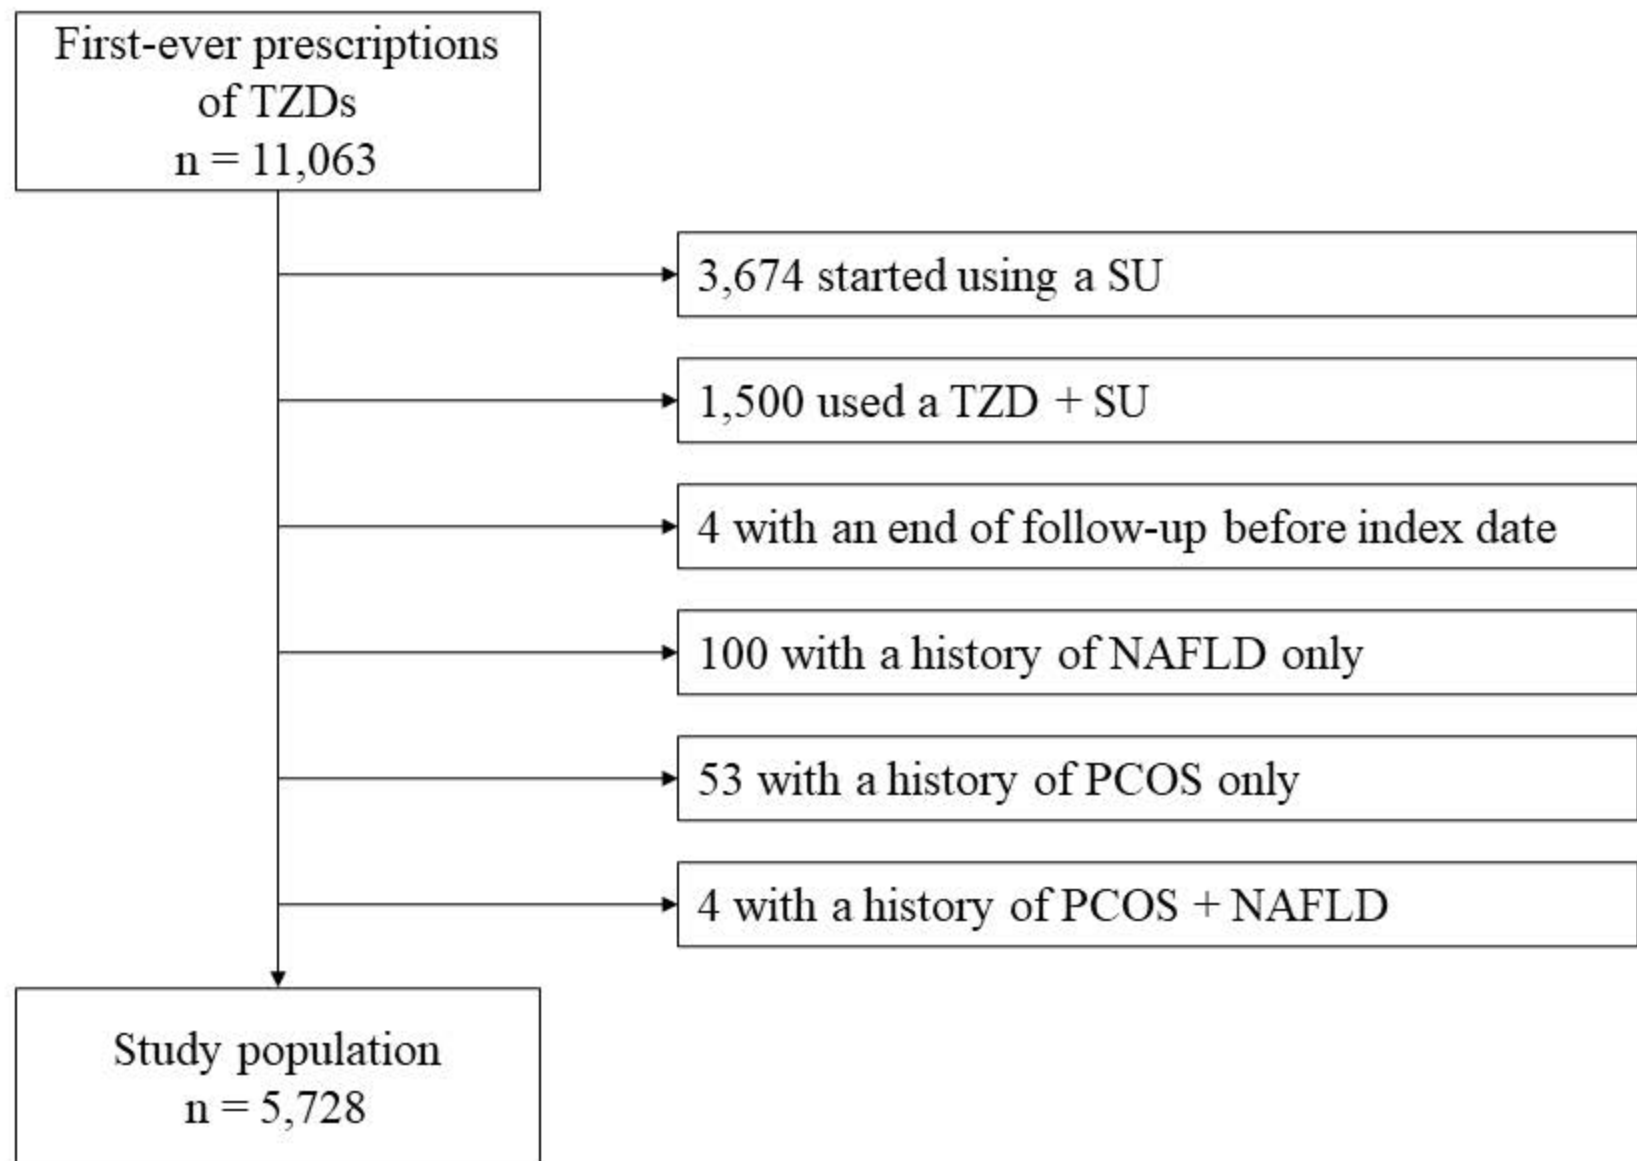

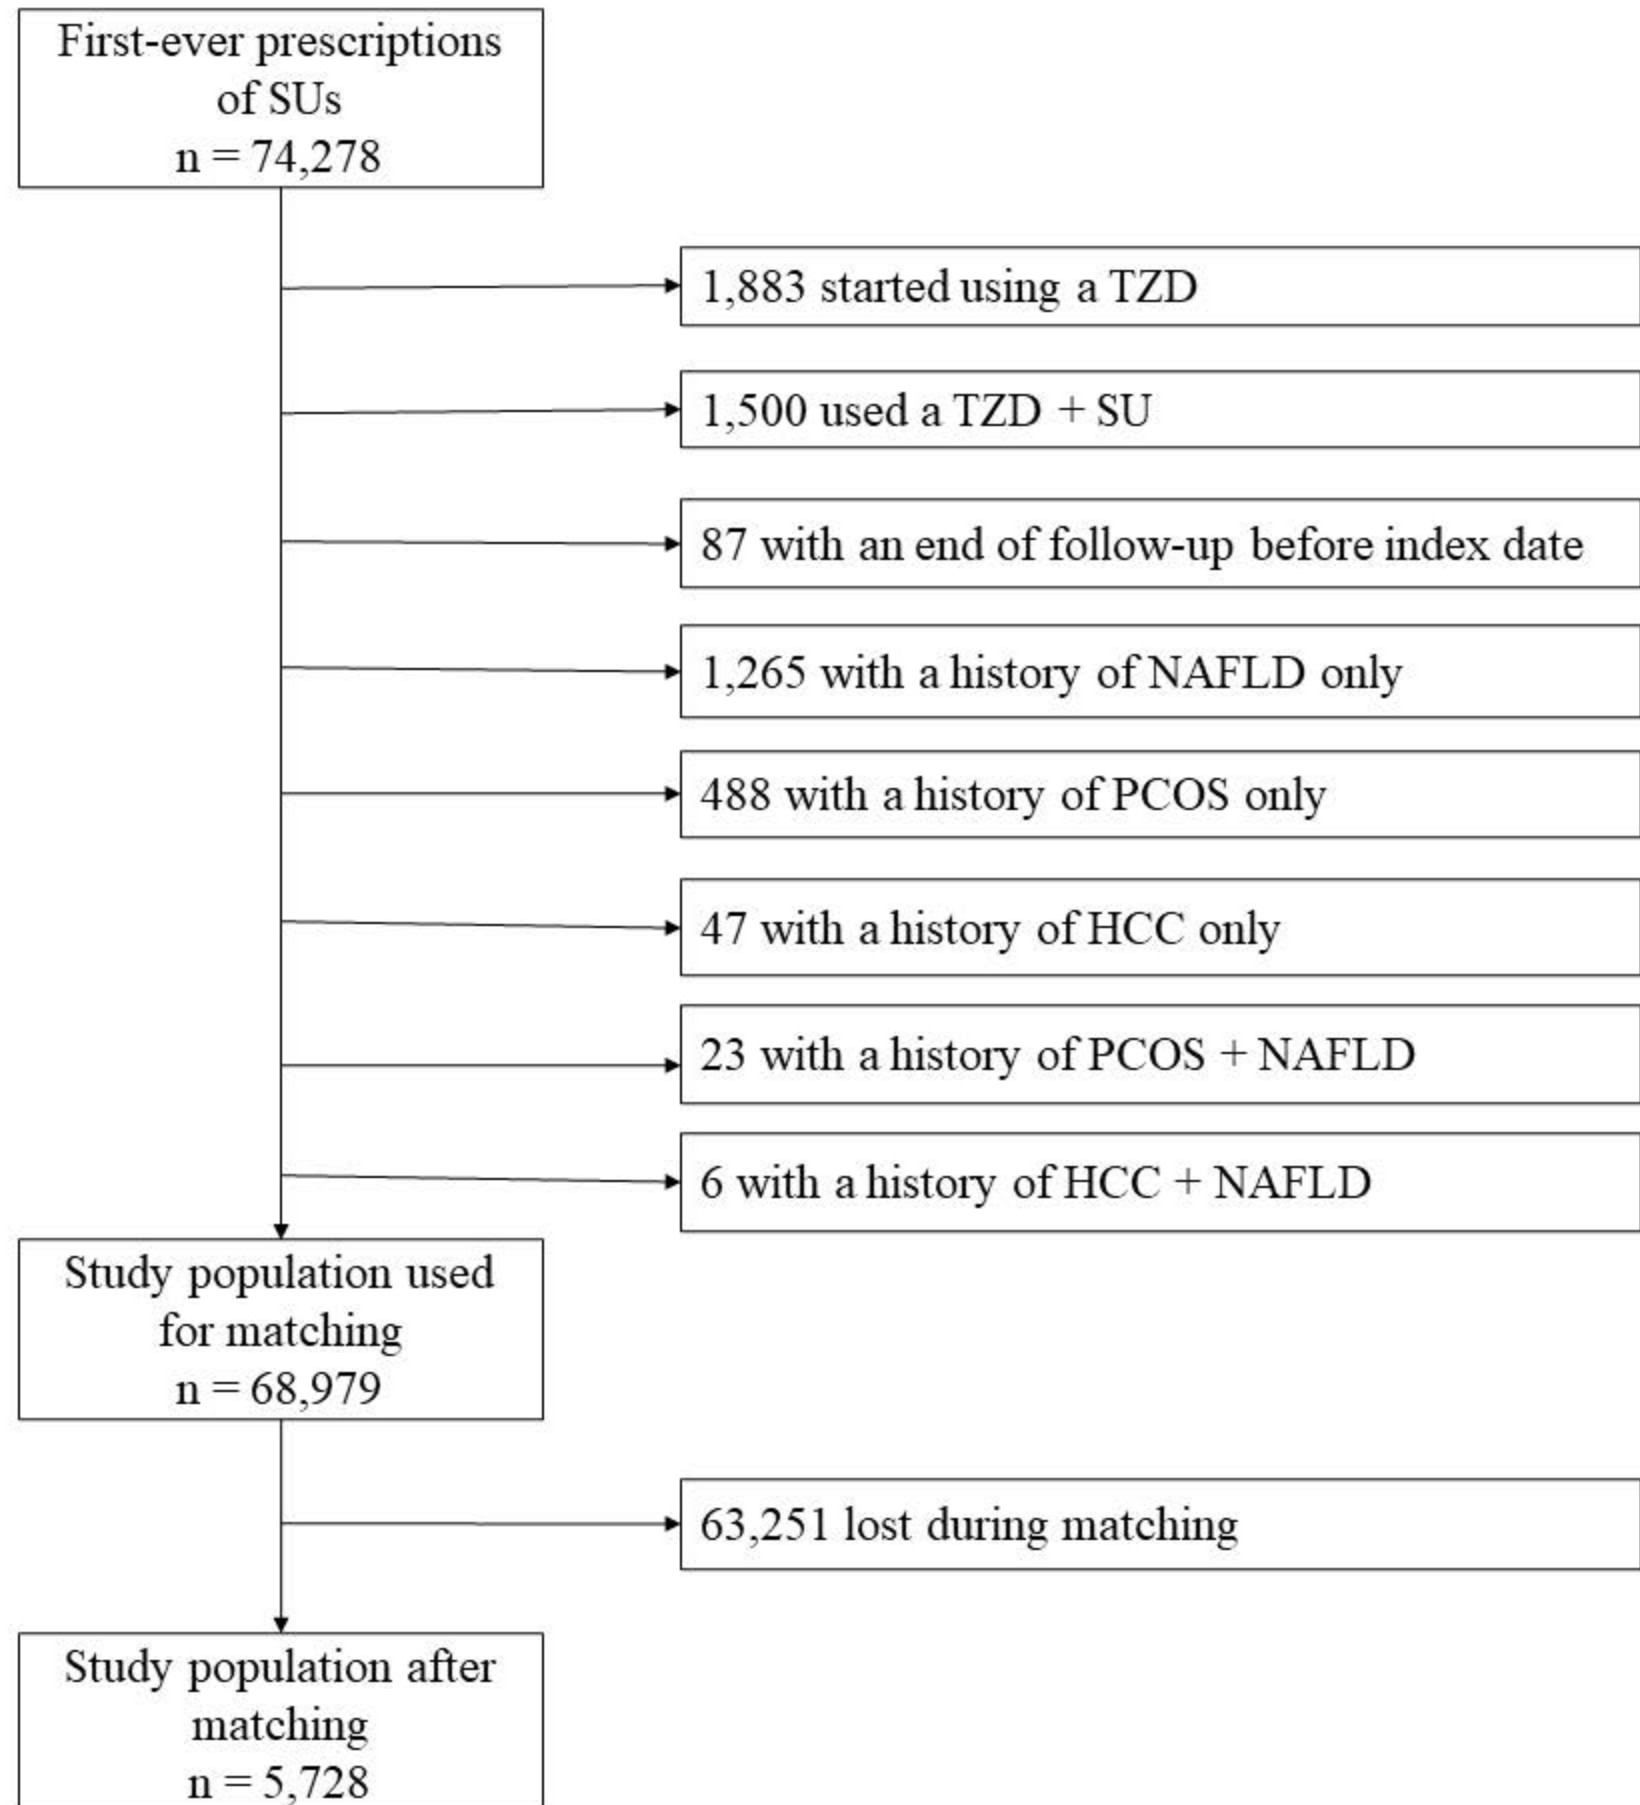

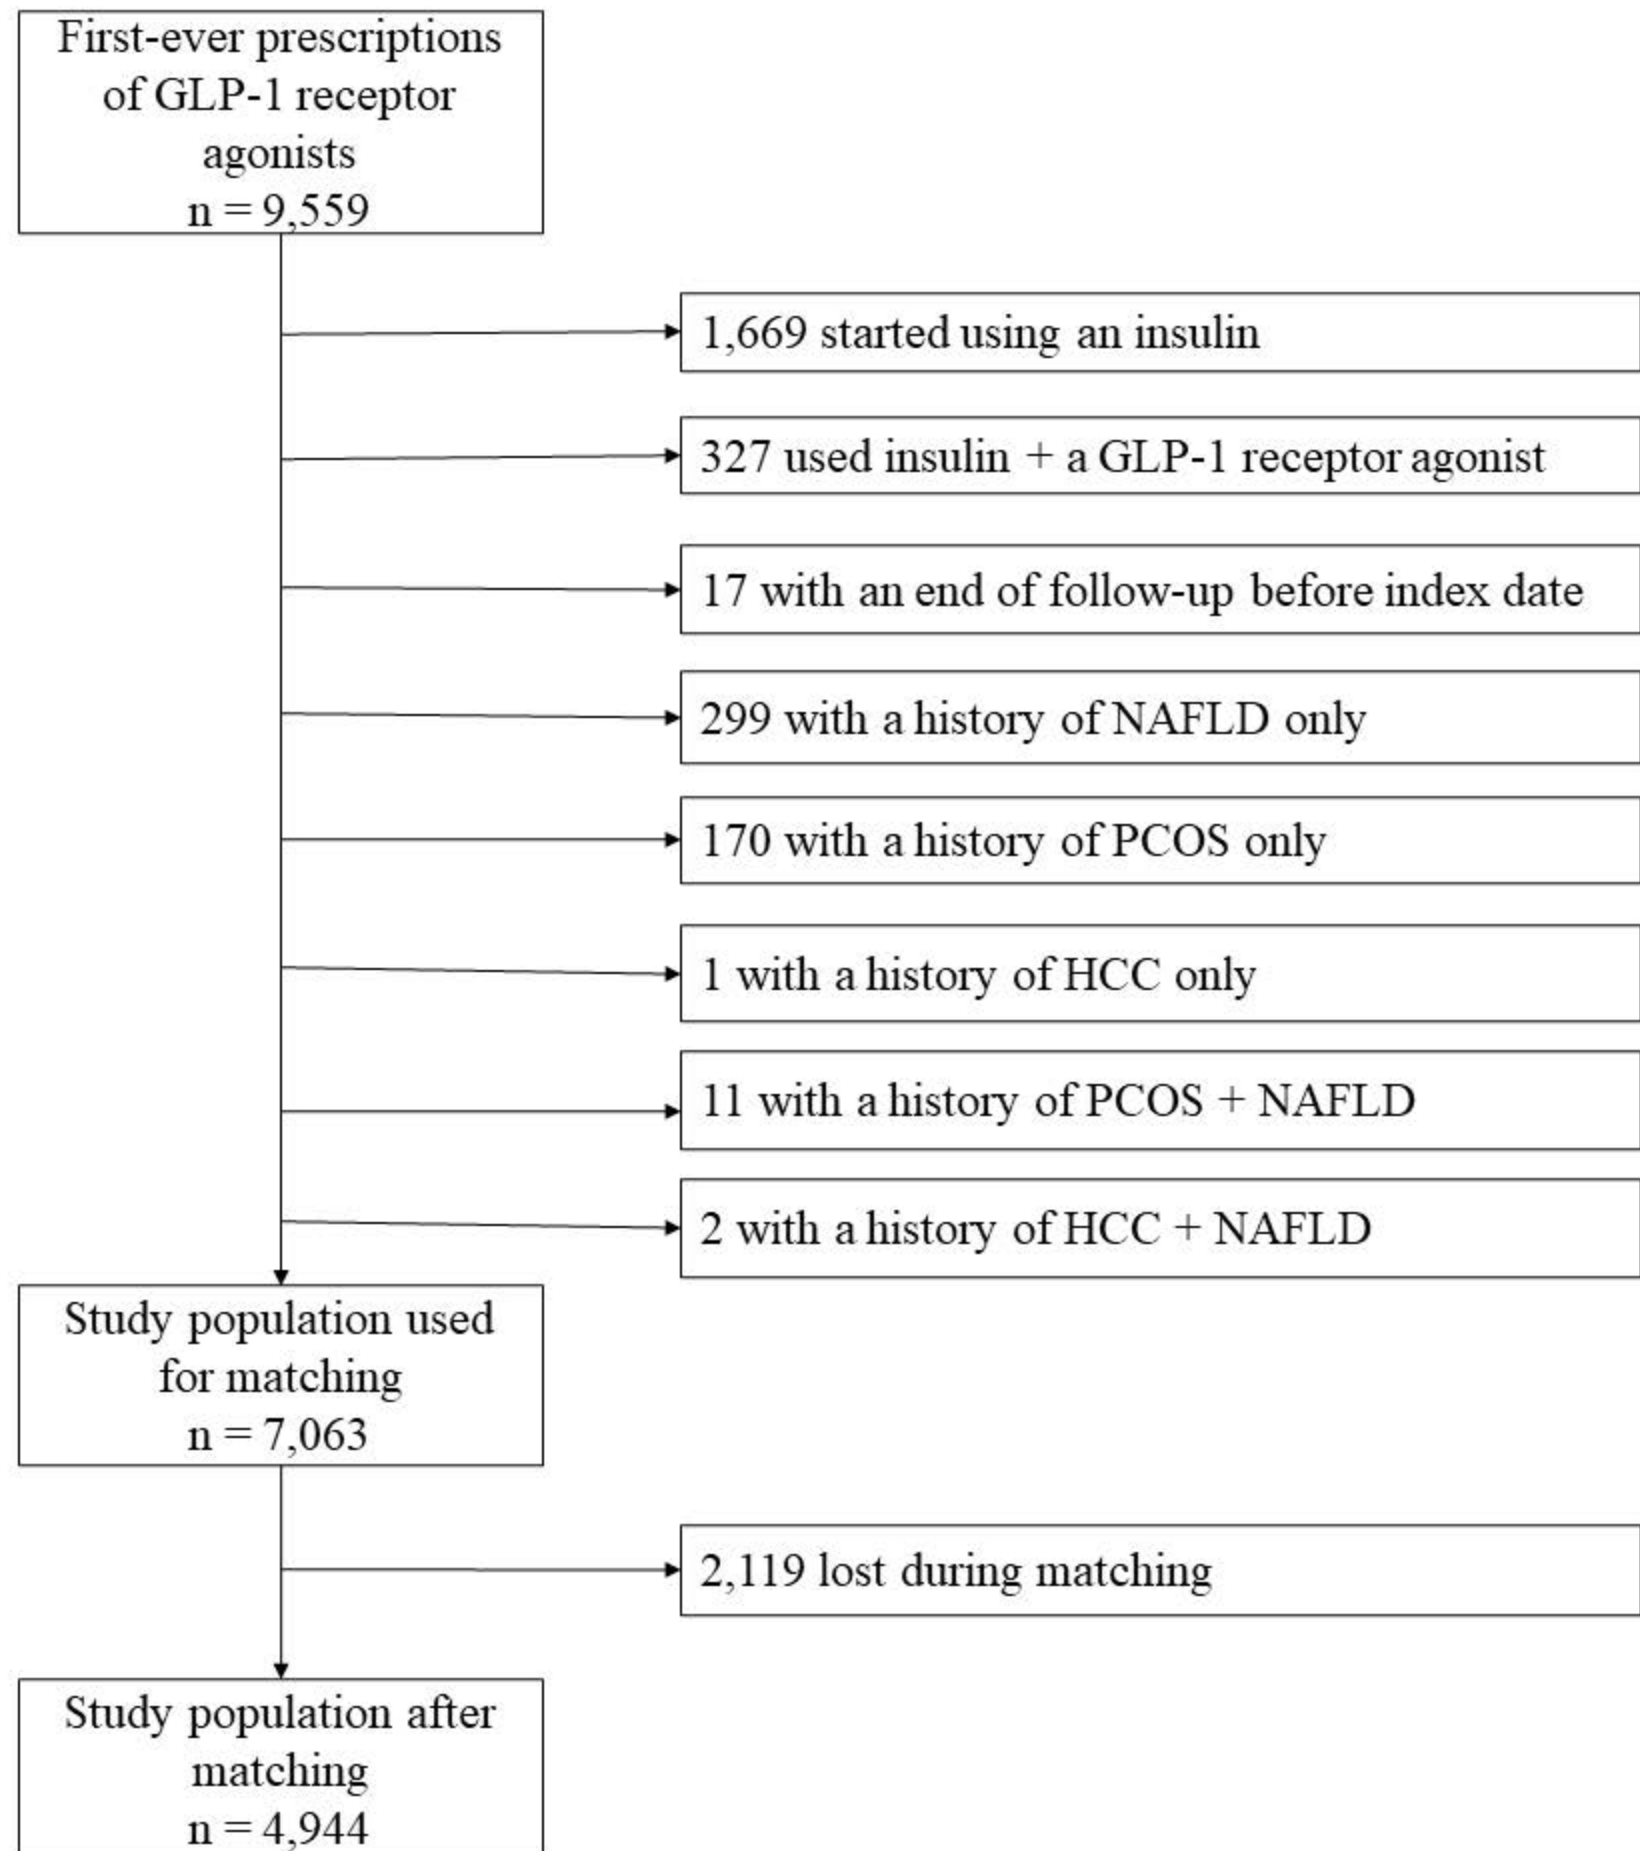

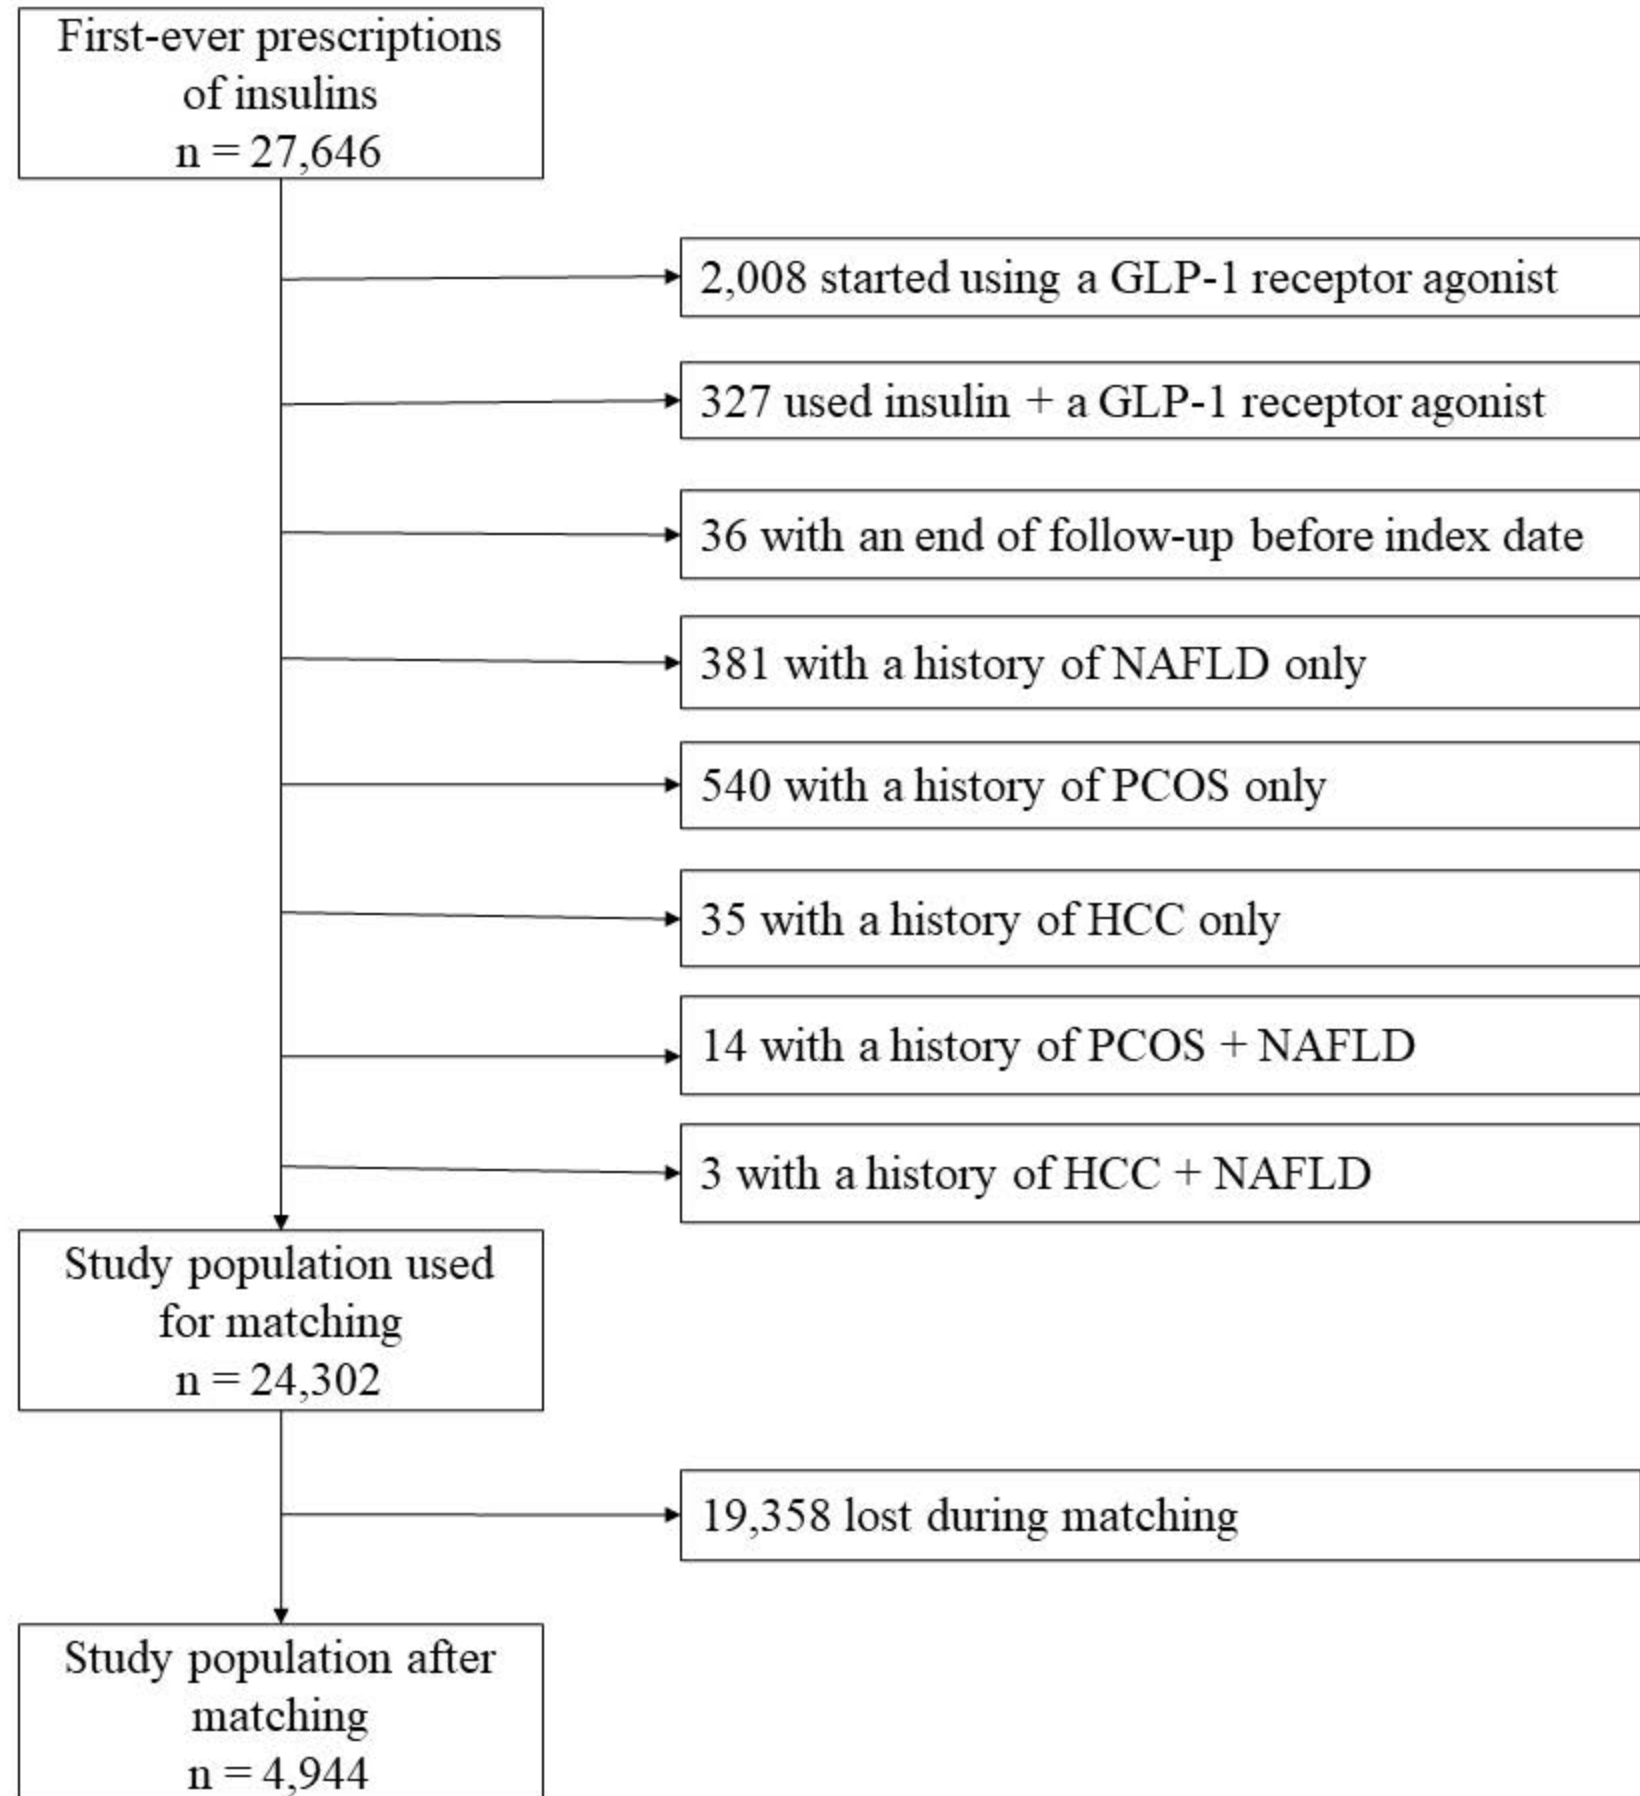

**A**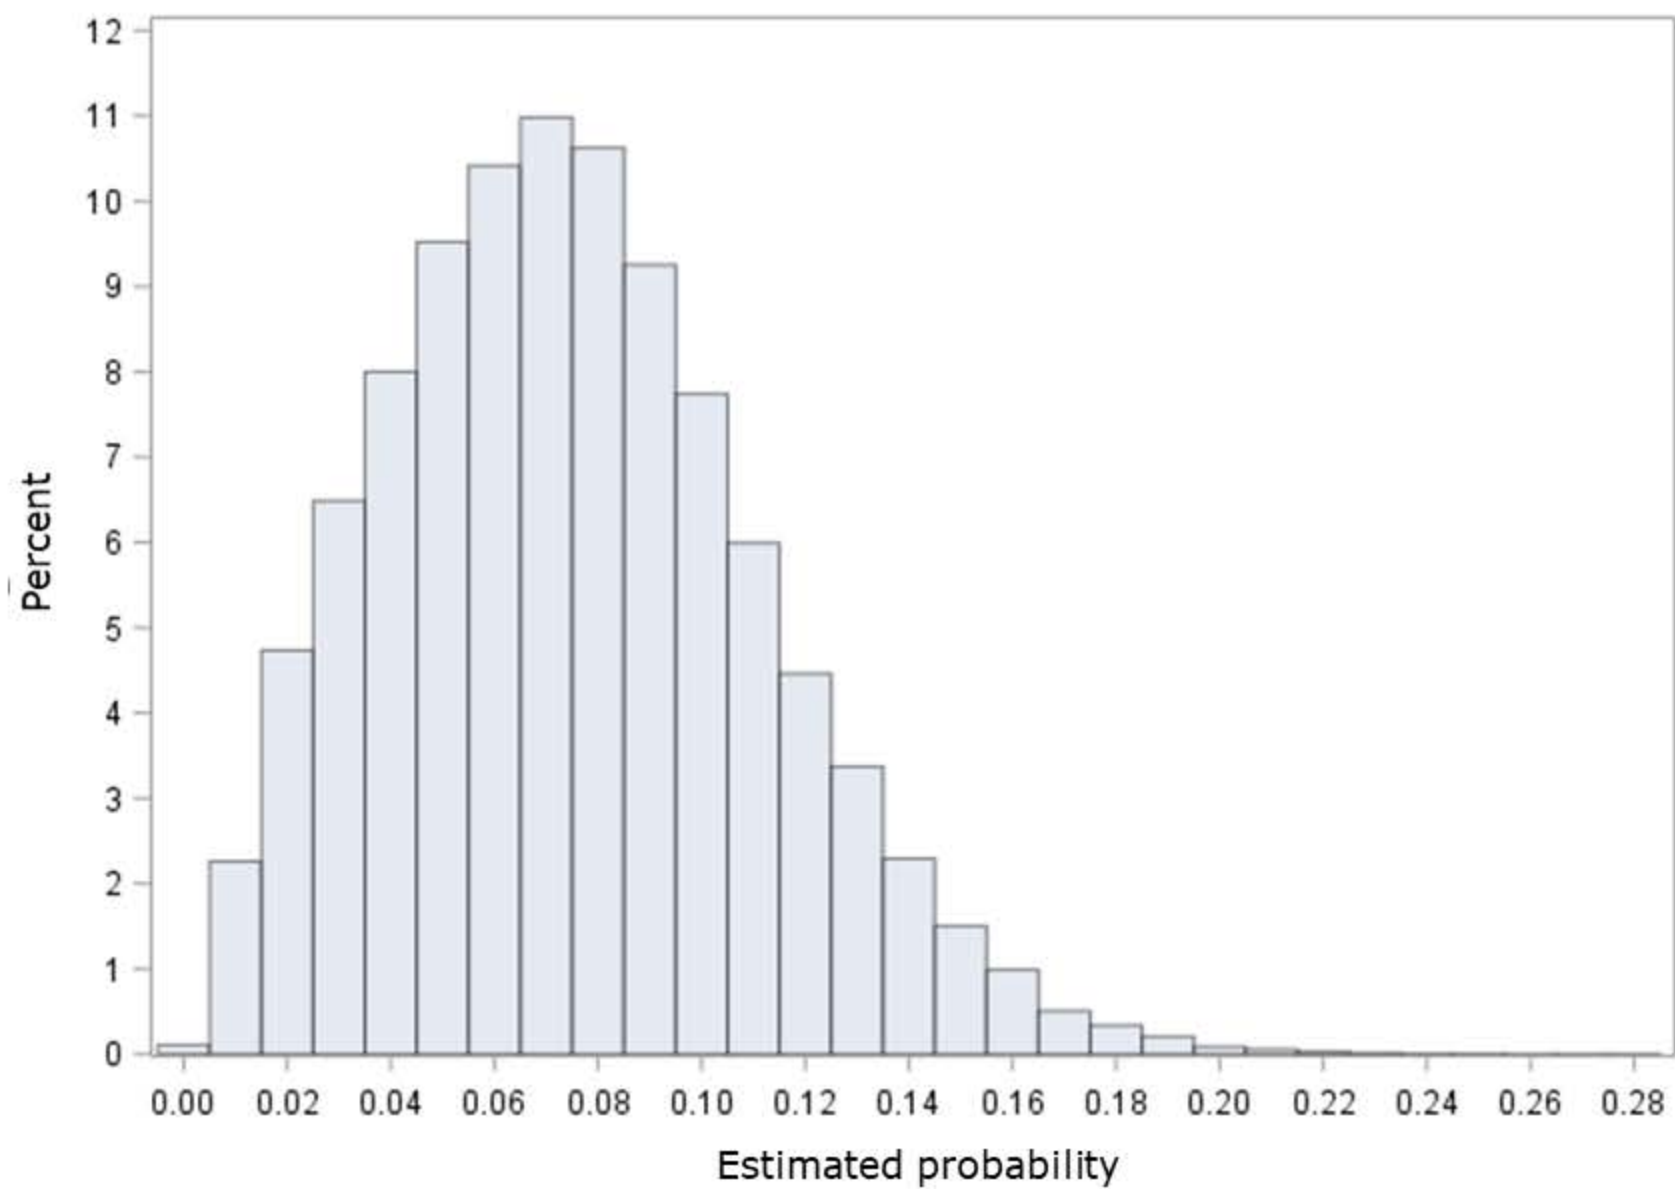**B**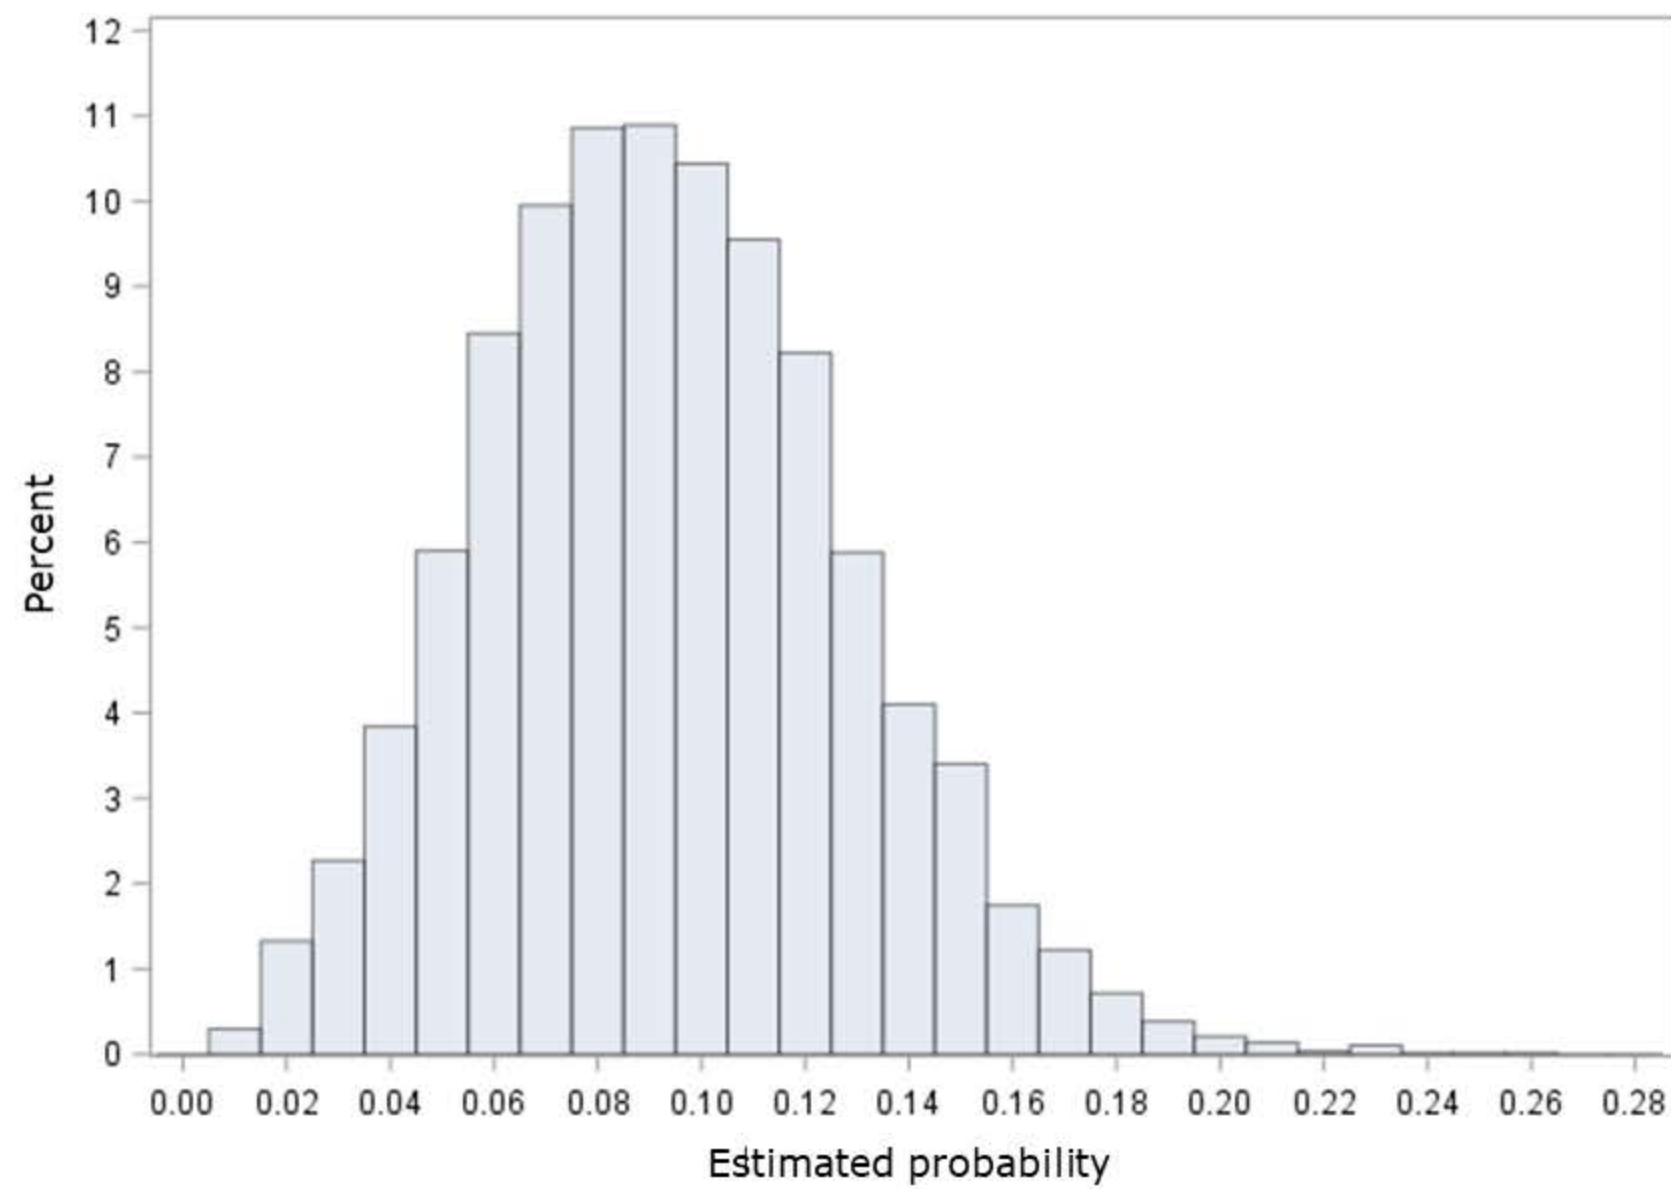**C**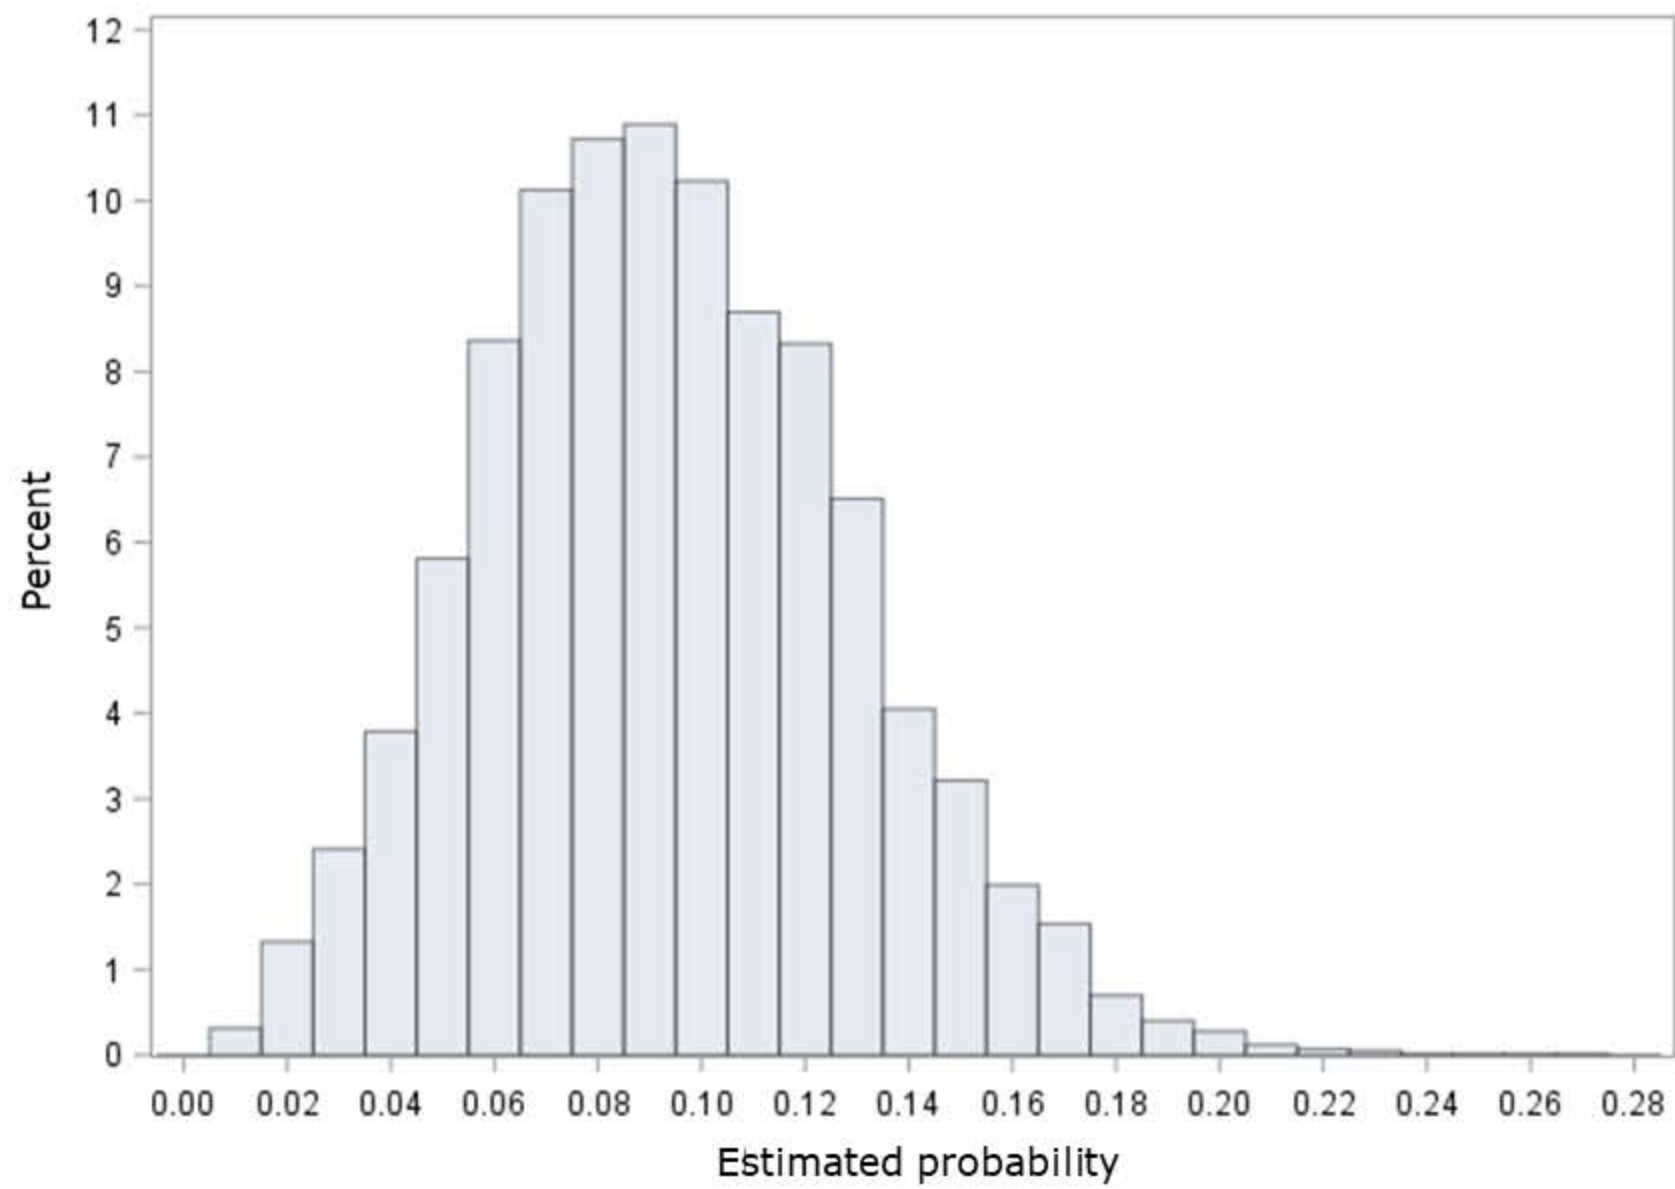**D**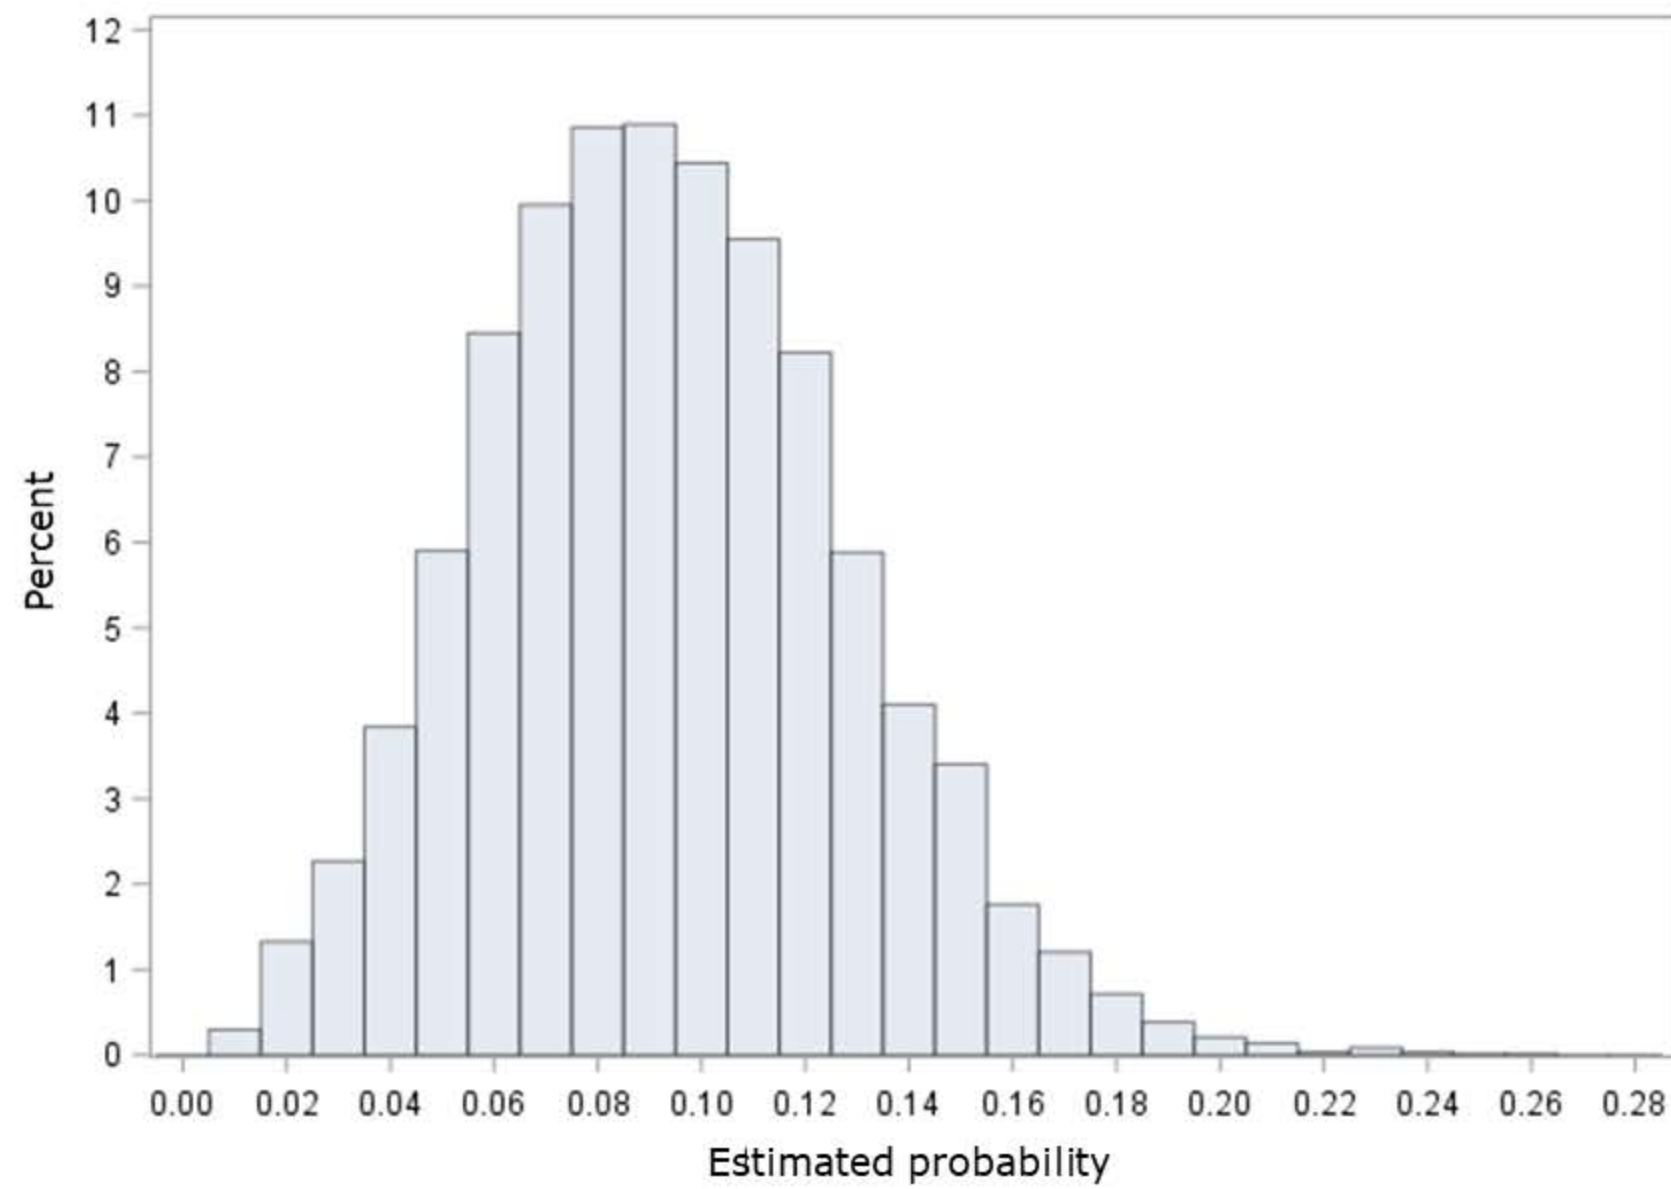



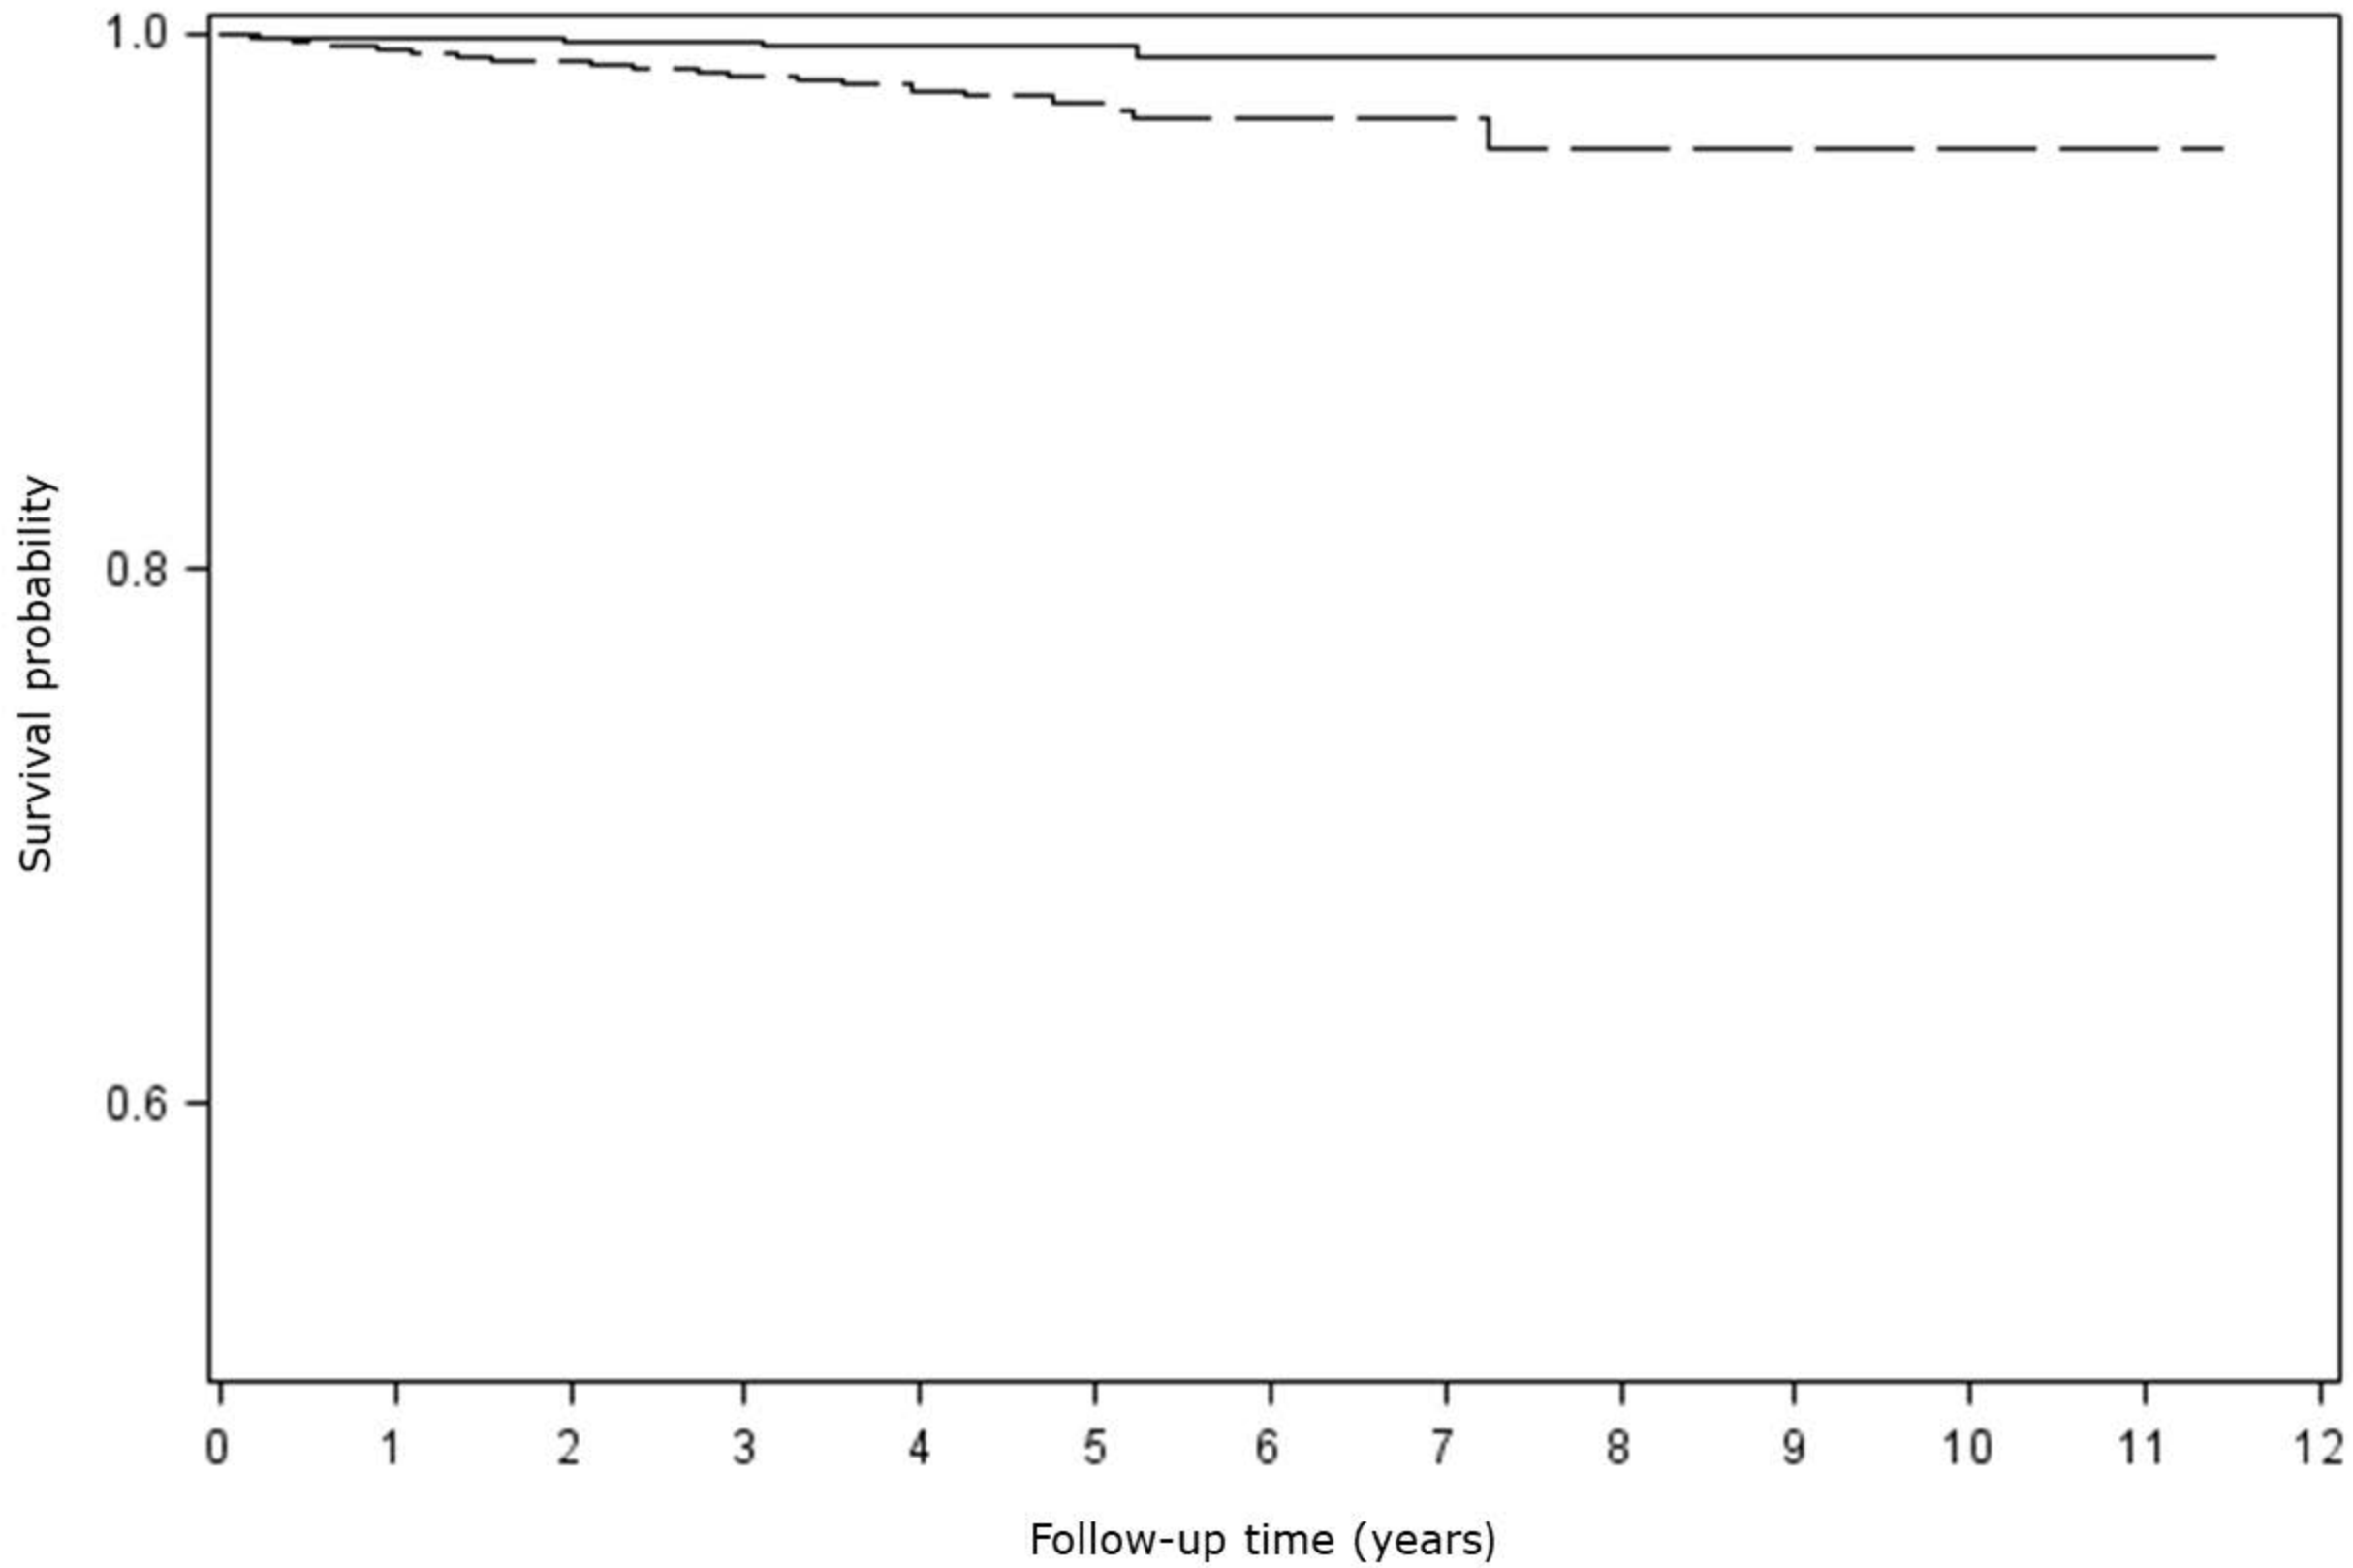

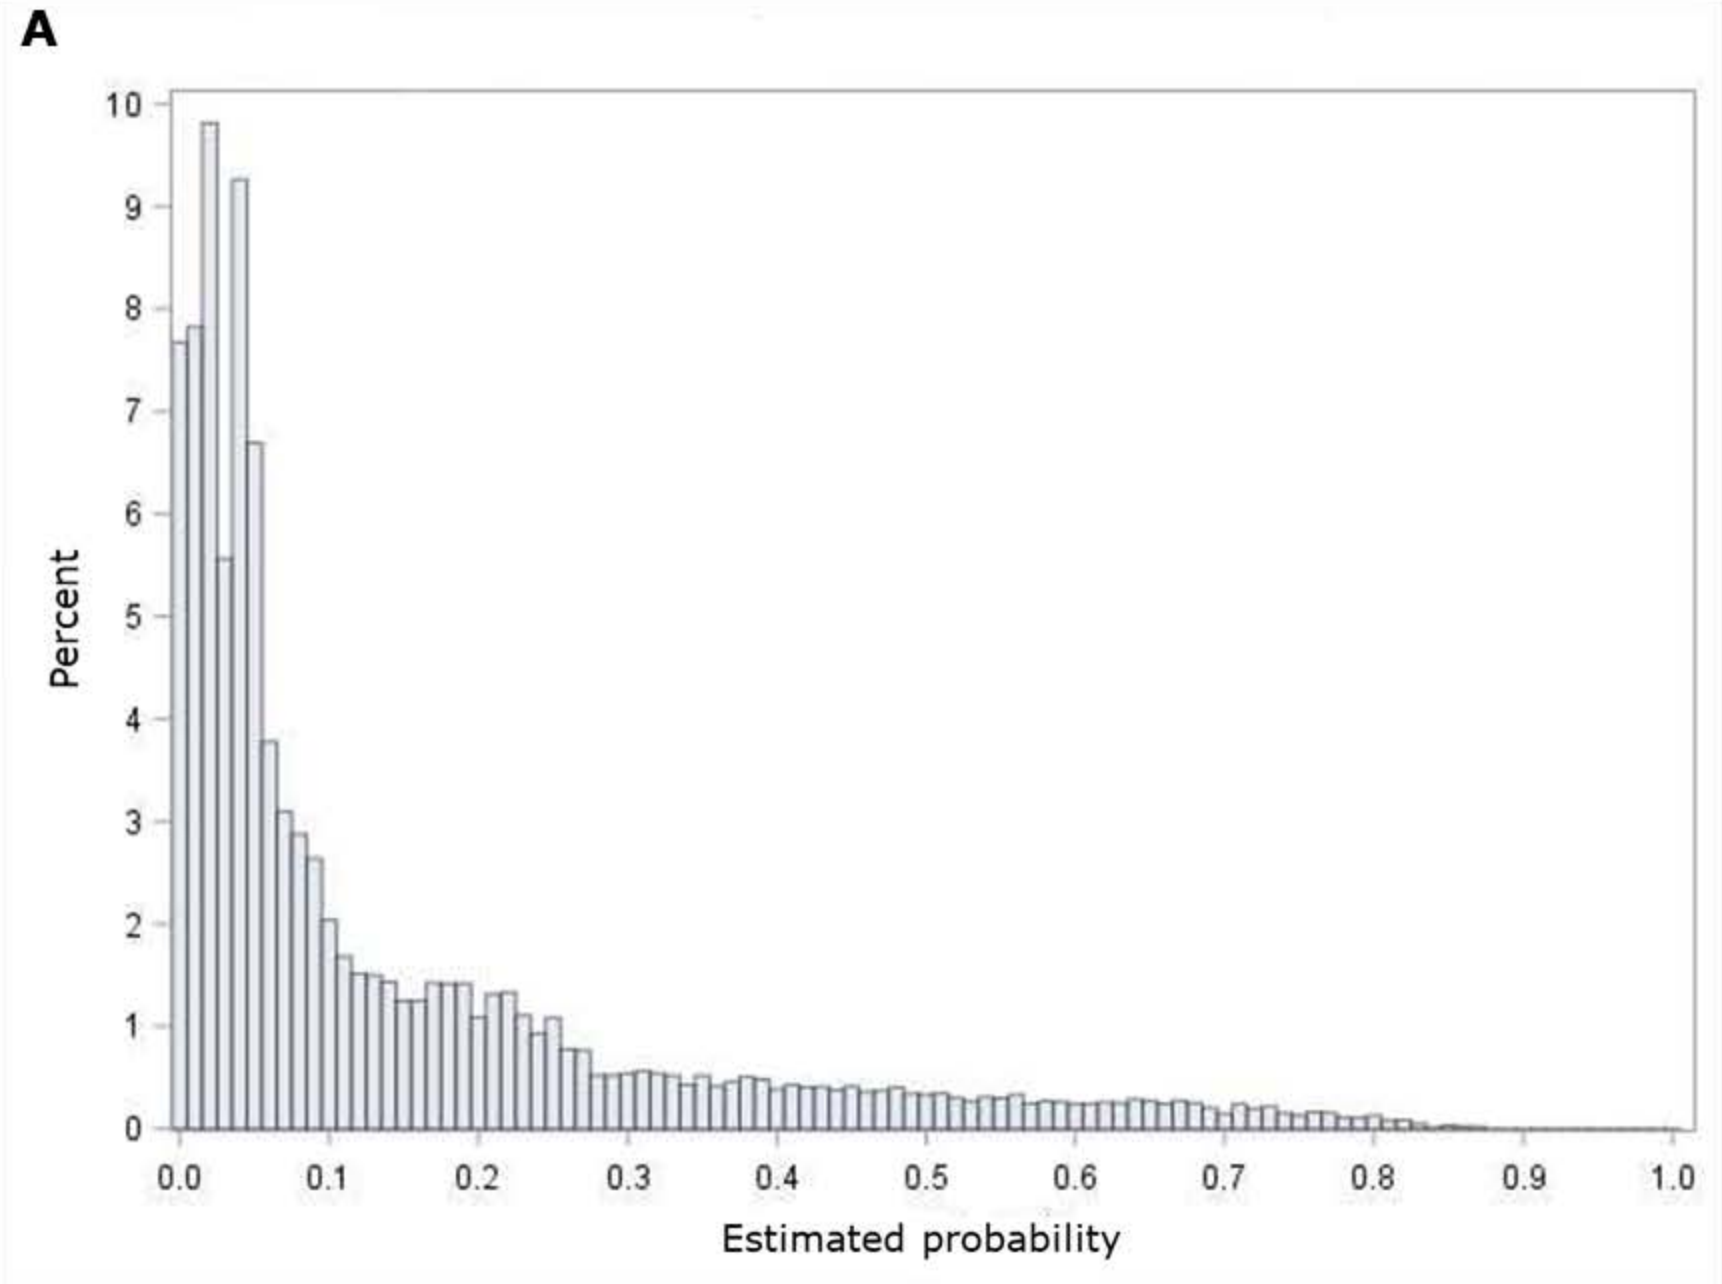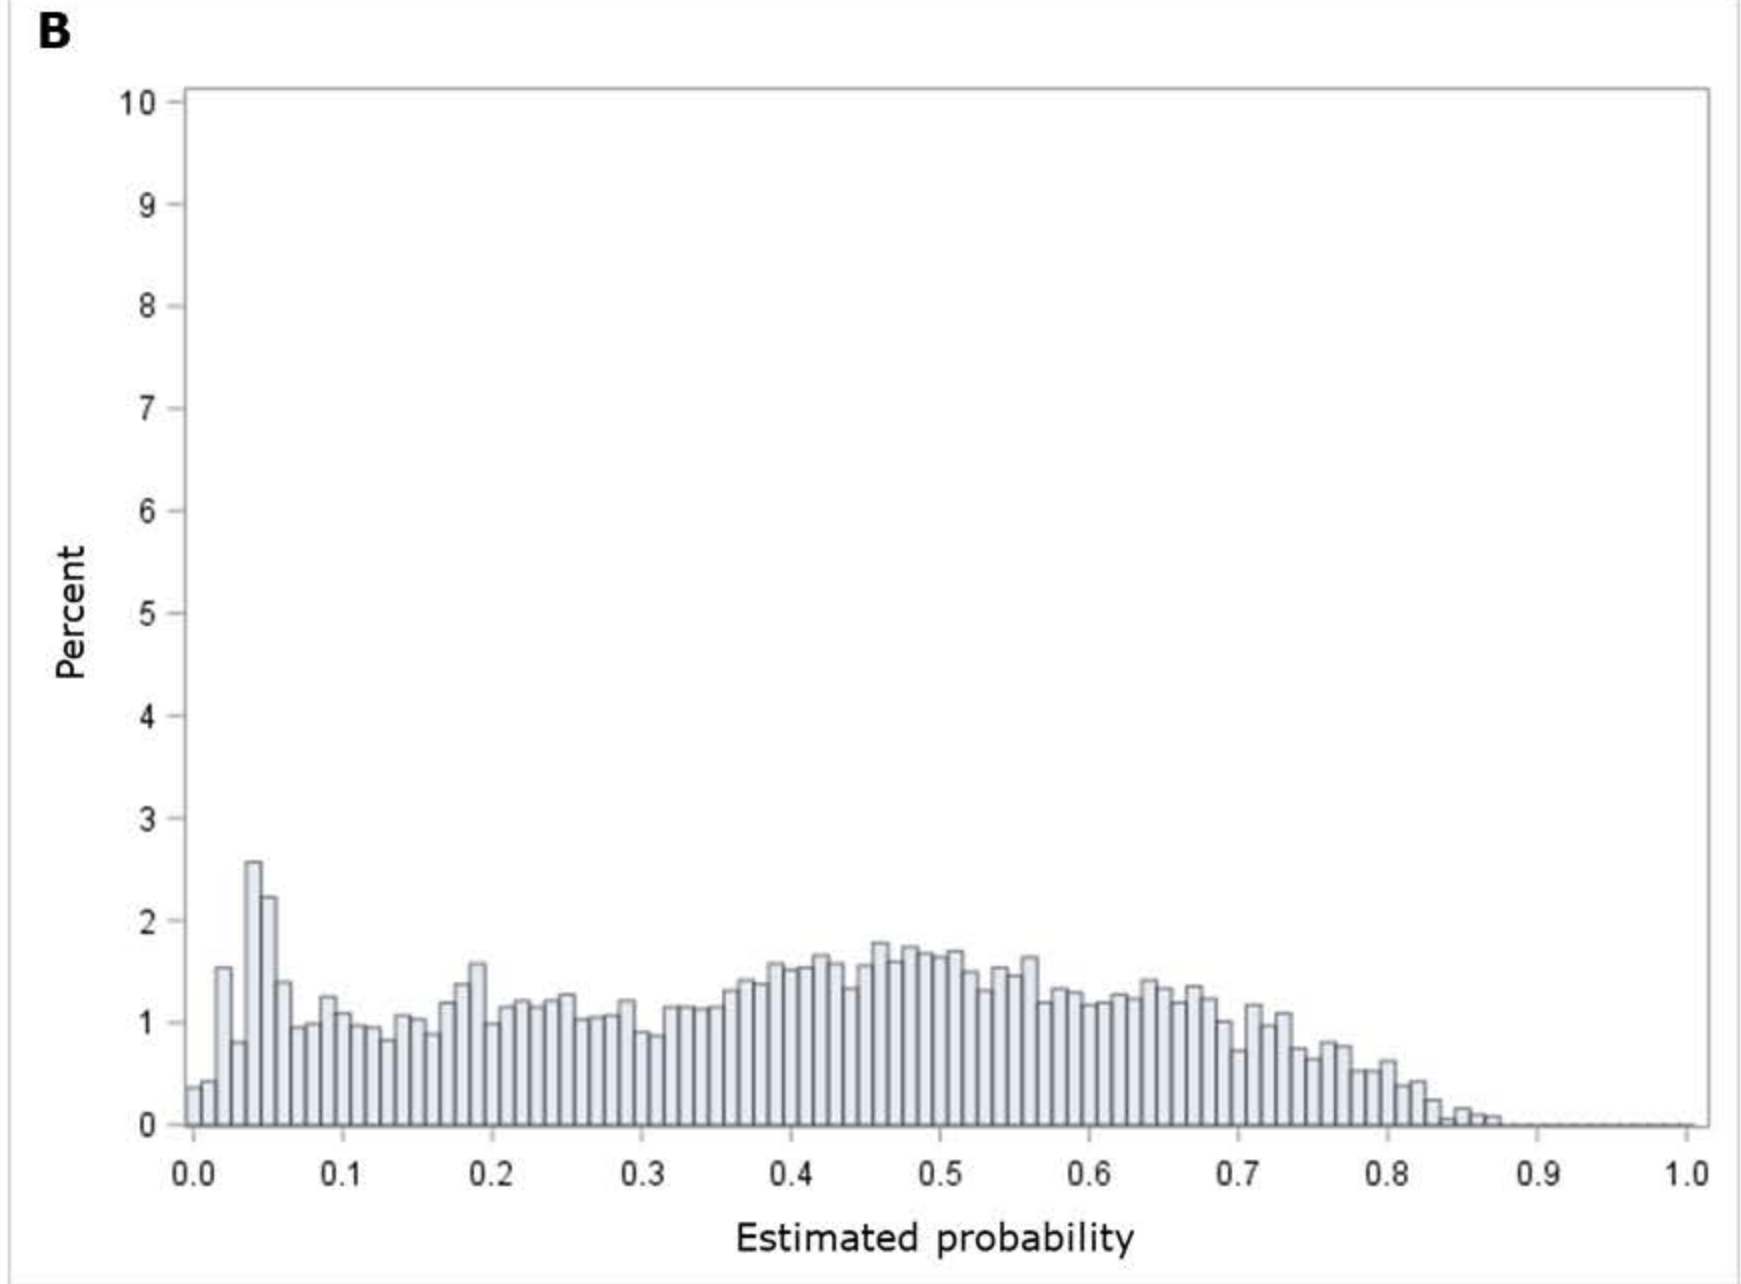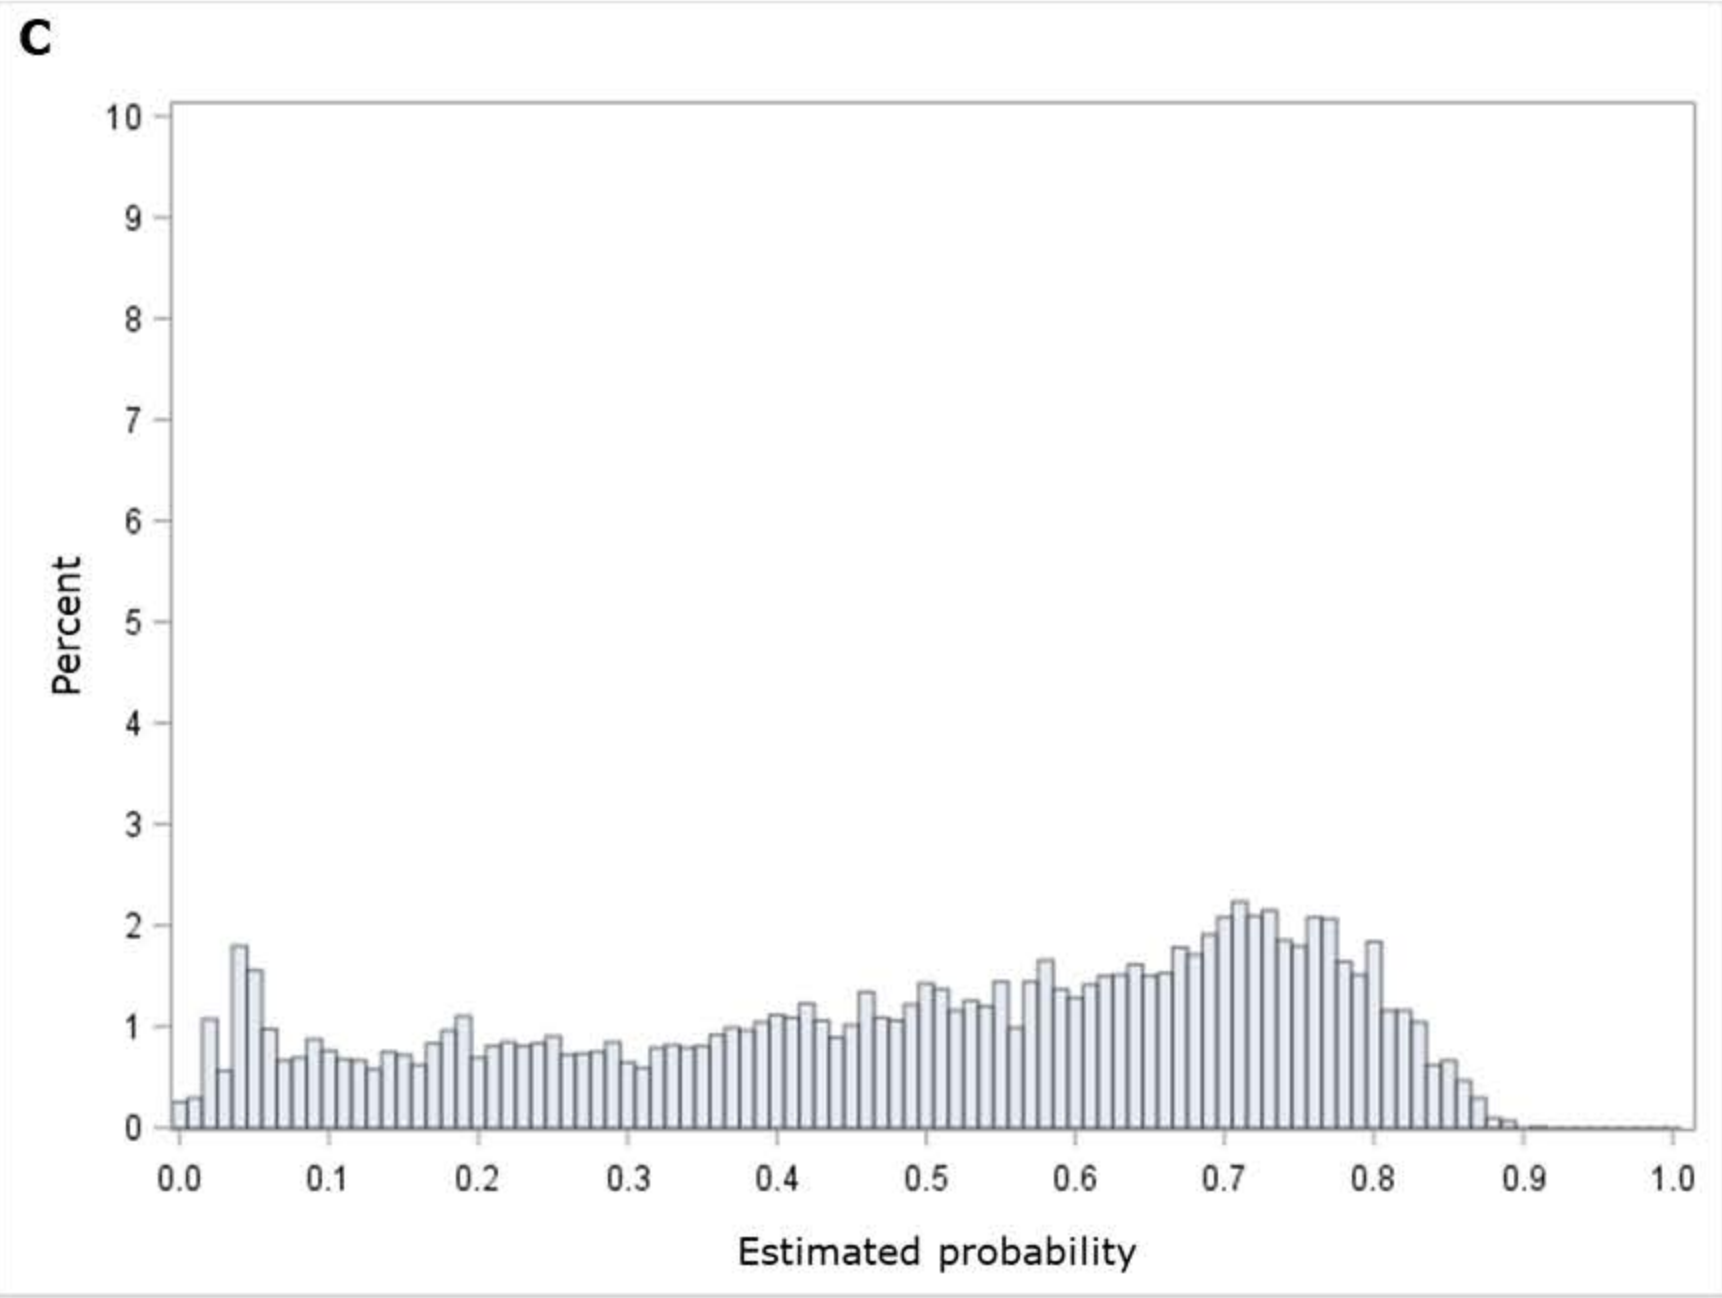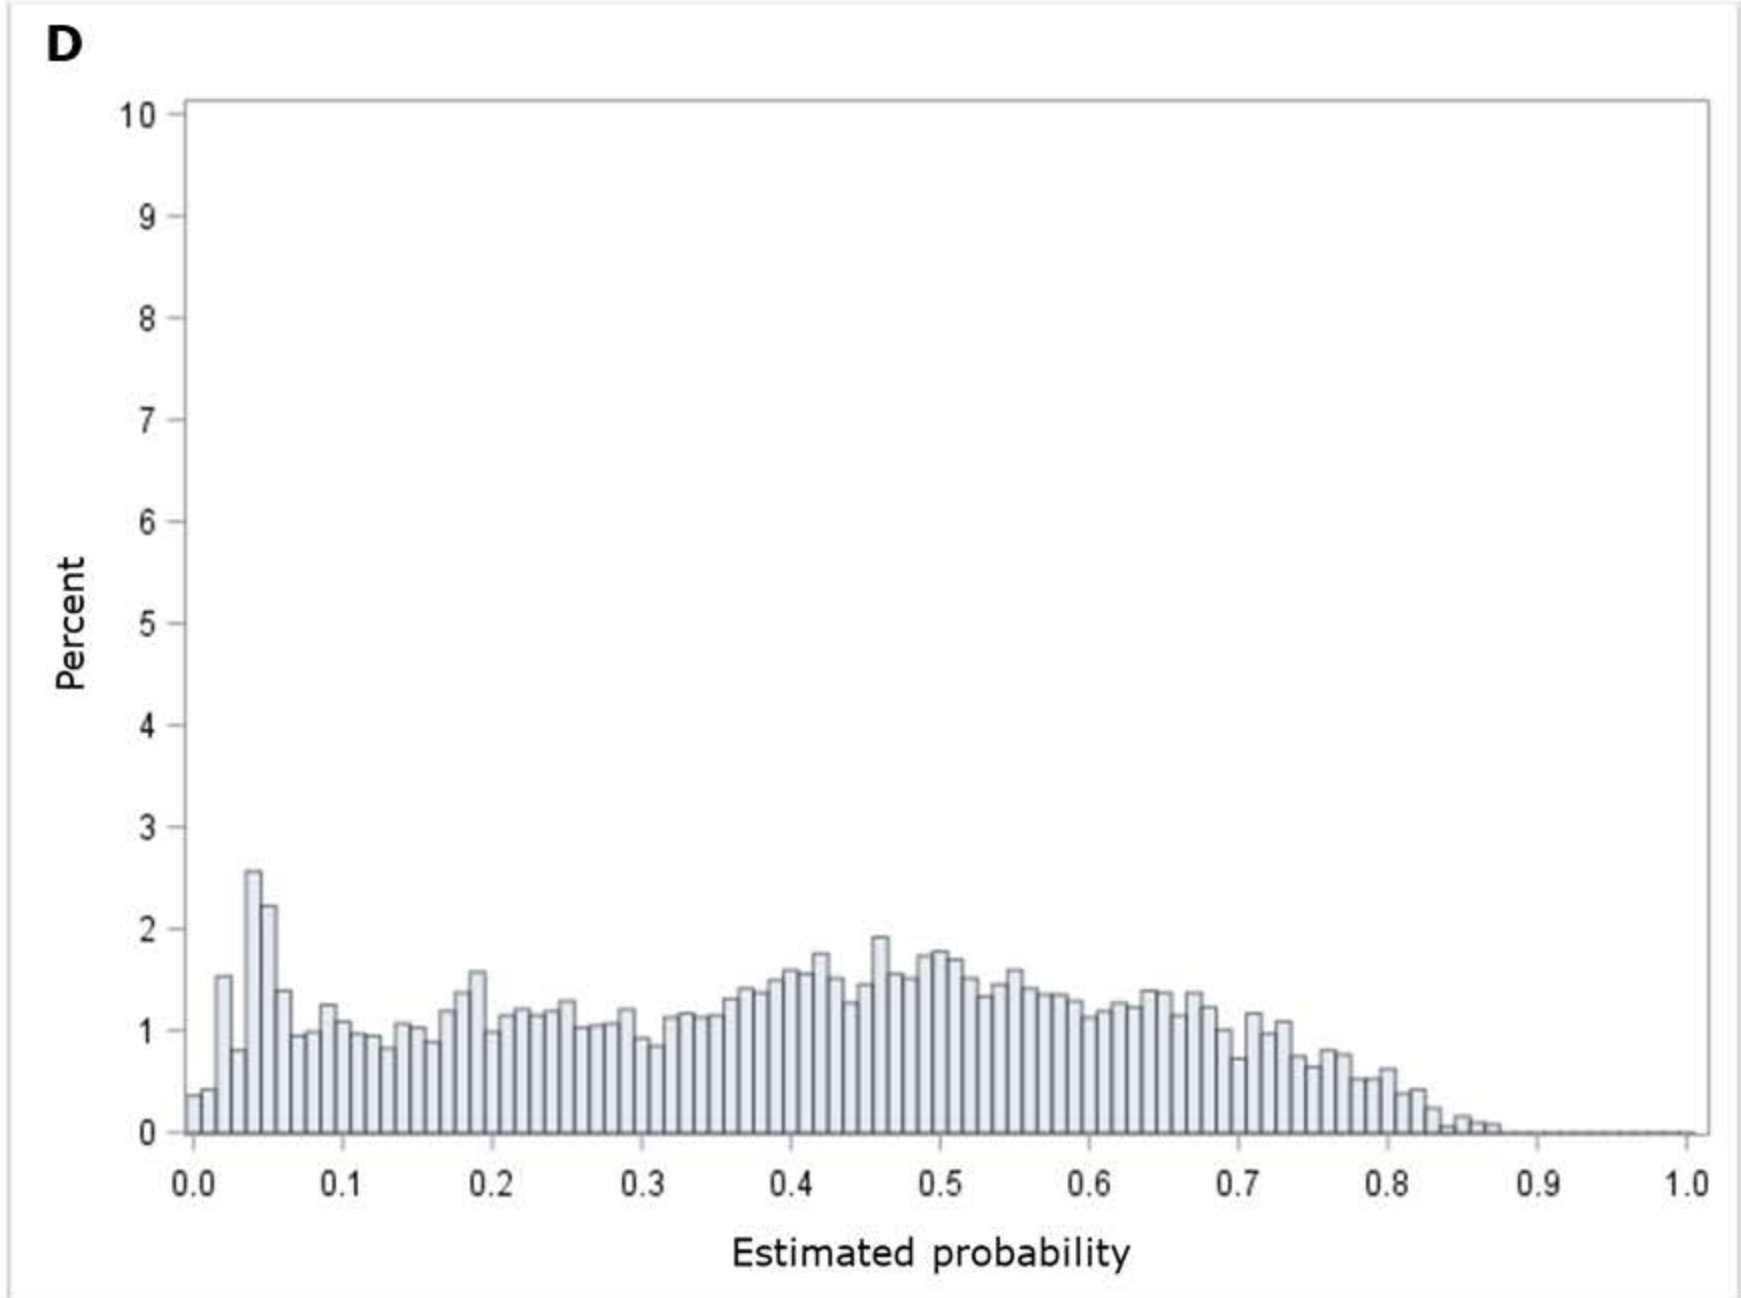

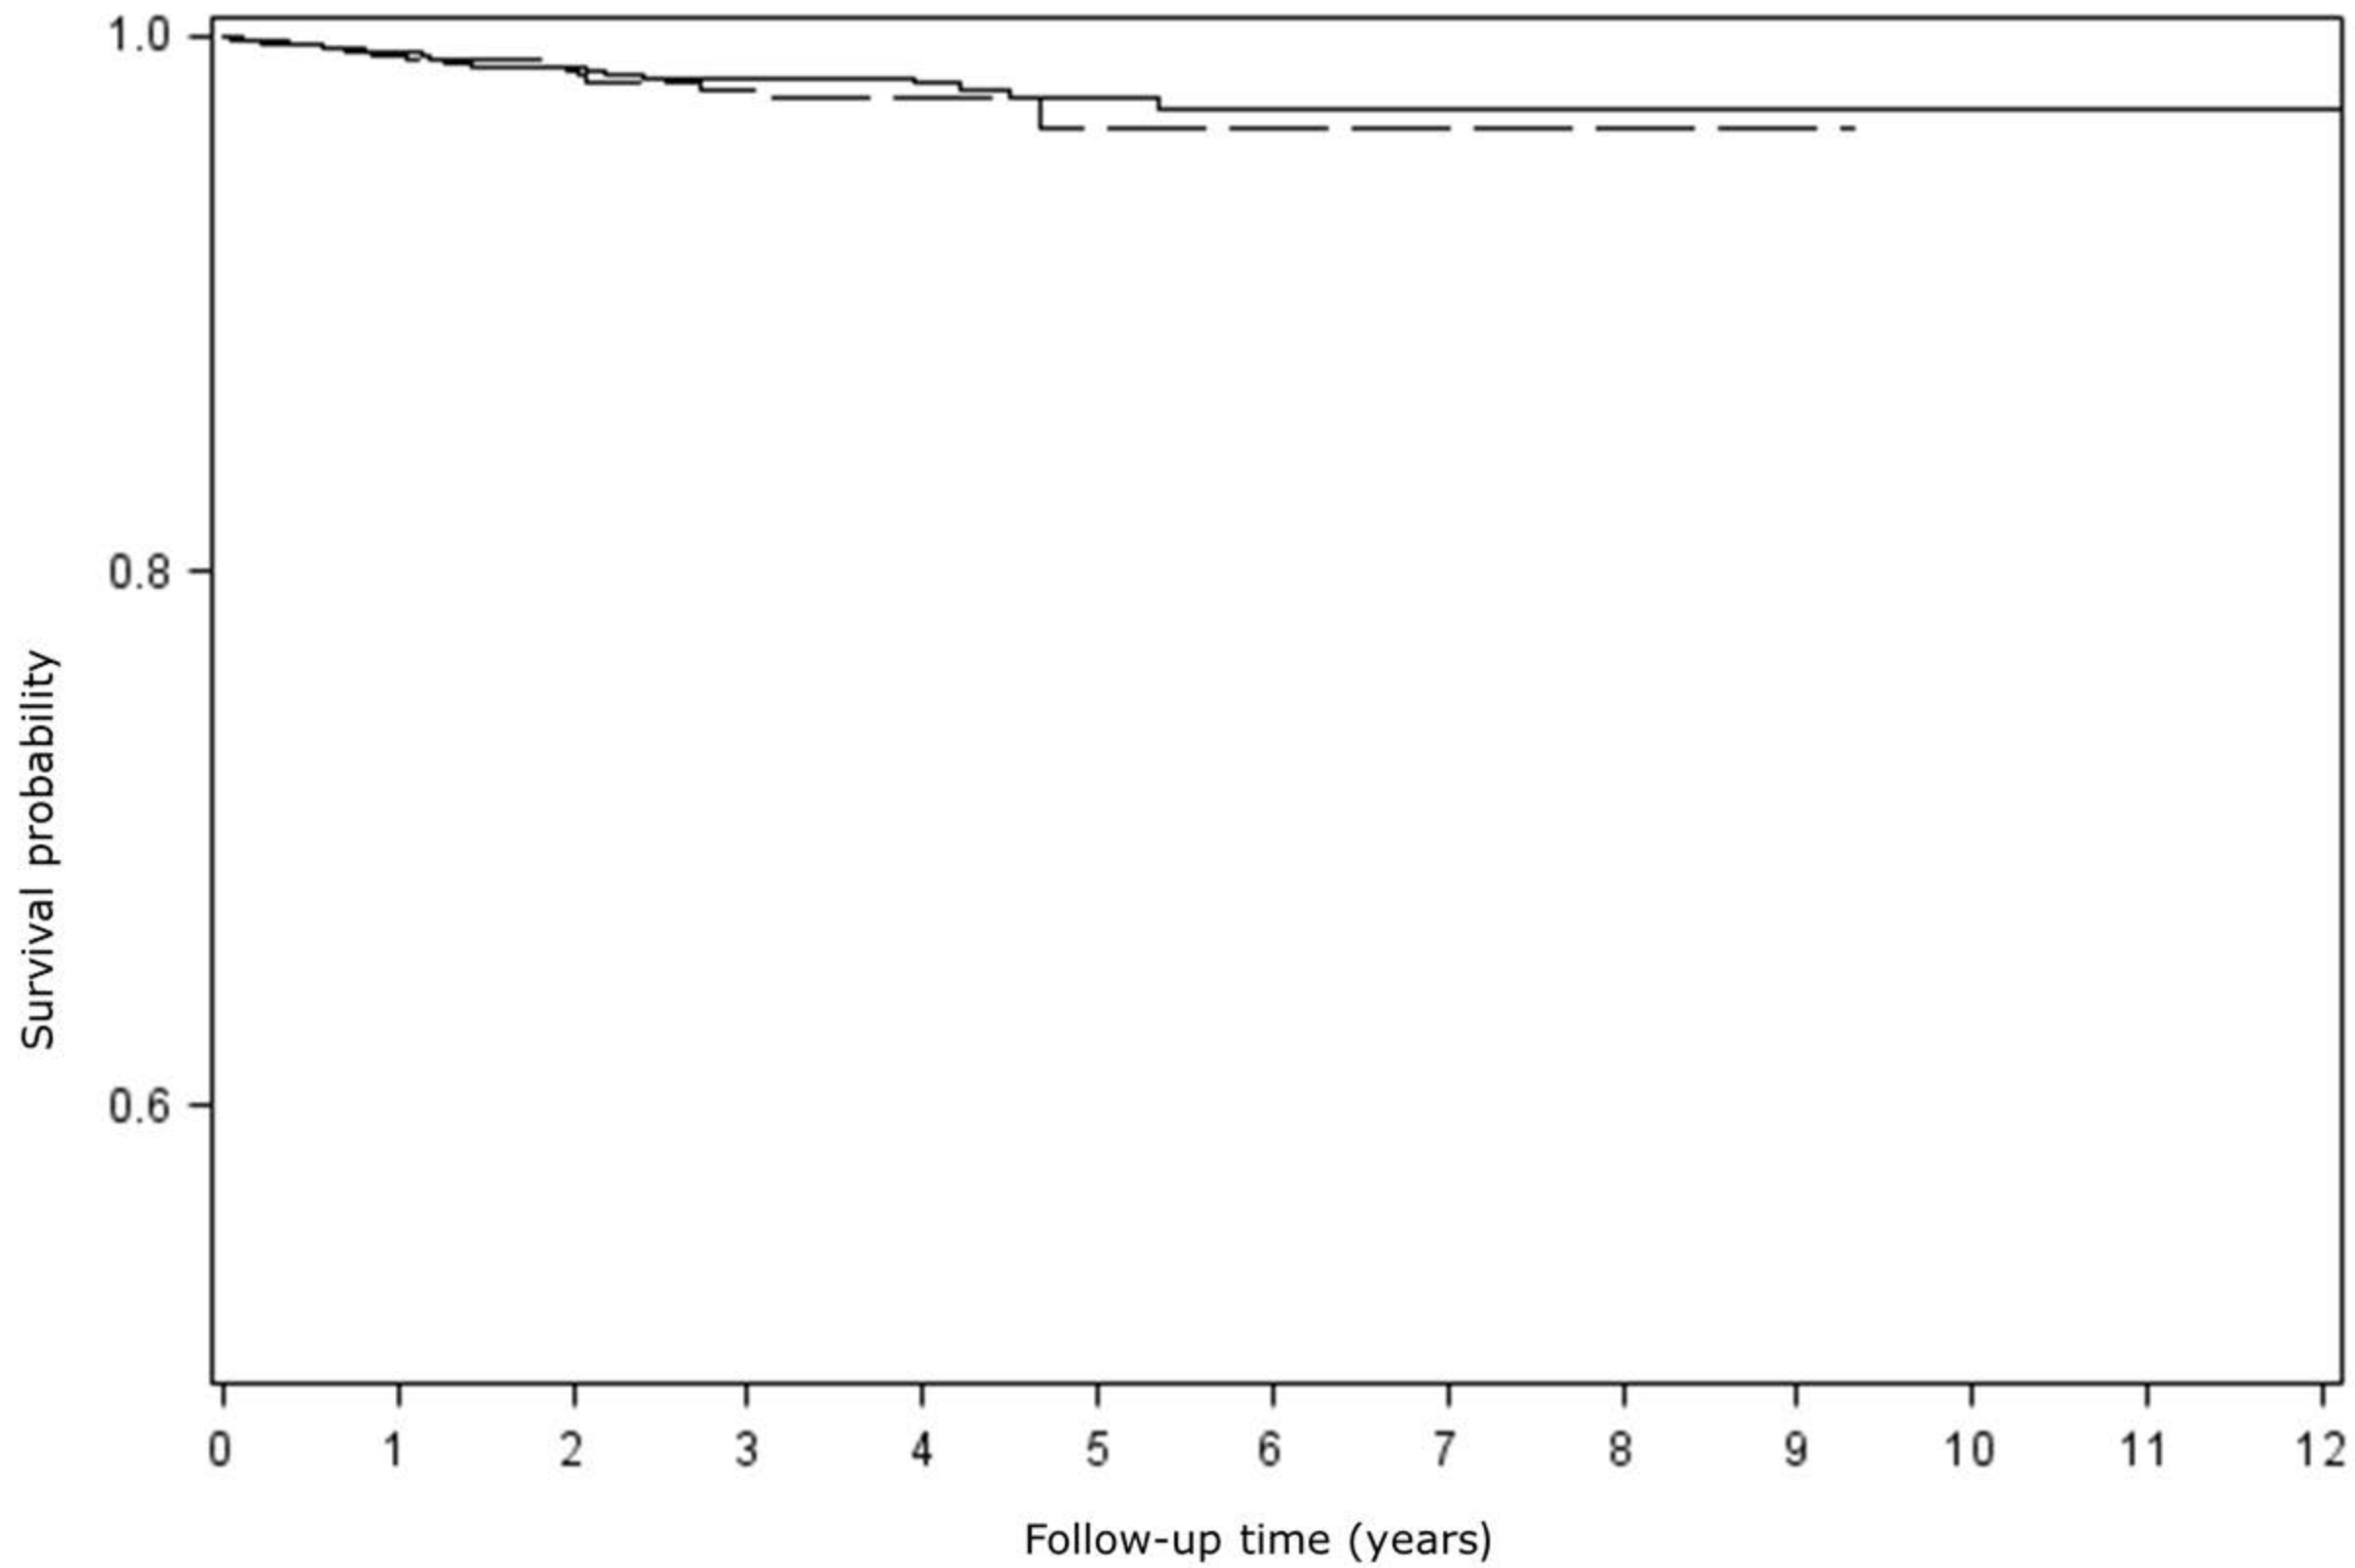

— — GLP-1 receptor agonist — — Insulin
